# Supplementary material for: A solid supported palladium(0) nano/microparticle catalyzed ultrasound induced continuous flow technique for large scale Suzuki reactions
Source: Royal Society of Chemistry journal article supplement (doi:10.1039/c3ra41364k), 2013-01-01
Supplement: c3ra41364k.pdf [file c3ra41364k.pdf]

## Supporting Information

# Solid supported palladium (0) nano/microparticles catalyzed ultrasound induced continuous flow technique for large scale Suzuki reaction

Arun K. Shil, Nitul Ranjan Guha, Dharminder Sharma, Pralay Das\*

*Natural Plant Products Division, CSIR- Institute of Himalayan Bioresource Technology, Palampur-176061, H.P., India.*

*Fax: +91-1894-230433; E-mail: pdas@ihbt.res.in*

| <b>Contents</b>                                                                                                                    | <b>Pages</b> |
|------------------------------------------------------------------------------------------------------------------------------------|--------------|
| <b>1) . Optimization table for SS-Pd catalysed ultrasound mediated Suzuki cross coupling reaction in a continuous flow process</b> | <b>2</b>     |
| <b>2) Typical experimental procedure for the Suzuki coupling reaction under continuous flow technique.</b>                         | <b>3</b>     |
| <b>2) Synthesis and characterization data for the products 2c-2m</b>                                                               | <b>4-7</b>   |
| <b>3) <sup>1</sup>H and <sup>13</sup>C NMR spectra of products</b>                                                                 | <b>8-25</b>  |
| <b>4) Powder XRD analysis data of SS-Pd</b>                                                                                        | <b>26-28</b> |

(1) **Table 1.** Optimization table for SS-Pd catalysed ultrasound mediated Suzuki cross coupling reaction in a continuous flow process

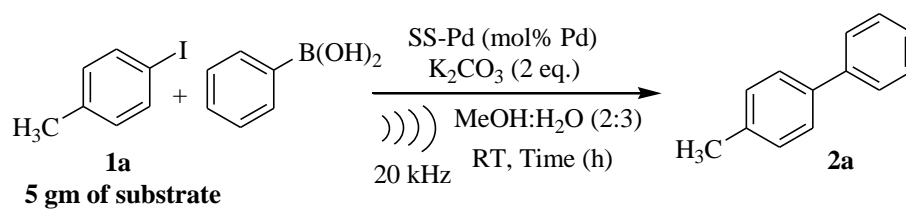

| Entry | Flow rate (ml/min.) | Amplitude (%) | Catalyst loading (mol% Pd) | Time (h) | % Yield <sup>a</sup> |
|-------|---------------------|---------------|----------------------------|----------|----------------------|
| 1     | 88                  | 30            | 3                          | 2.5      | 72                   |
| 2     | <b>127</b>          | <b>30</b>     | <b>3</b>                   | <b>3</b> | <b>85</b>            |
| 3     | 136                 | 30            | 3                          | 3.5      | 84                   |
| 4     | 127                 | 20            | 2                          | 4        | 70                   |
| 5     | 136                 | 30            | 5                          | 3        | 82                   |

<sup>a</sup>Isolated yields

(2) Typical experimental procedure for the Suzuki coupling reaction under continuous flow technique.

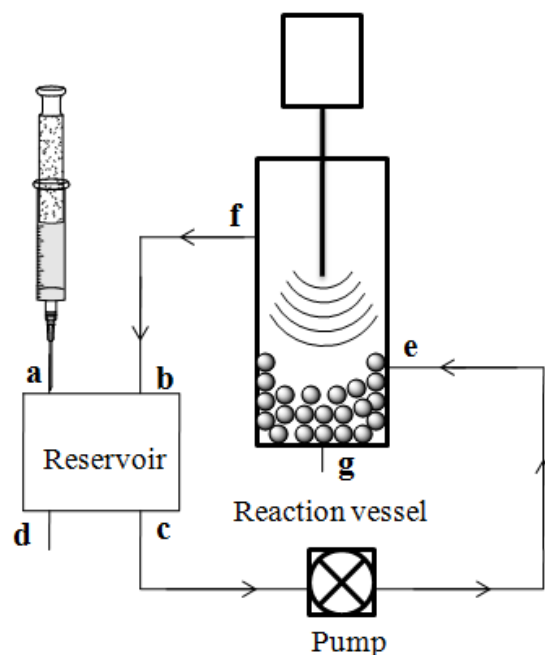

Fig. 1 Schematic outline of continuous flow technique

4-Methoxybiphenyl (**2b**) (Table 1, entry 2)

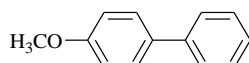

A mixture of 4-iodanisole **1b** (5 gm., 0.021 mol), phenylboronic acid (3.12 gm., 0.025 mol), potassium carbonate (5.80 gm., 0.042 mol) were taken in an oven dried 250 ml round bottomed flask and 200 ml of MeOH : H<sub>2</sub>O (2:3) was added into it. The resulting mixture was homogenized by stirring at room temperature. The SS-Pd (14 gm., 0.0006 mol Pd) catalyst was charged in the reaction vessel having cotton plug at outlet, and attached to the probe holder with a screw. The previously prepared reaction mixture was poured (through **b**) into the reservoir. The stopcock **c** was opened and the pump was also turned on to circulate the reaction mixture through reaction vessel. After approximately one cycle the ultrasonicator was turned on and the circulation of the reaction mixture was continued through **c**→**e**→**f**→**b** path. The progress of reaction was monitored by TLC by taking out small amount of

reaction mixture from stopcock **d**. On completion, the whole reaction mixture was drained out through stopcock **d** and concentrated on rotary evaporator. The concentrated reaction mixture was extracted with ethyl acetate (3×20 ml). The combined organic layer was dried over anhydrous Na<sub>2</sub>SO<sub>4</sub> and the solvent was removed under reduced pressure. The crude residue was purified by silica gel (mesh 230-400) column chromatography using hexane: EtOAc (98:2) as eluent to afford **2b** as crystalline white solid (3.55 gm., 92%); mp 87-89 °C; <sup>1</sup>H NMR (300 MHz; CDCl<sub>3</sub>) δ = 3.87 (s, 3H), 7.00 (d, *J* = 9 Hz, 2H), 7.31-7.36 (m, 1H), 7.42-7.47 (m, 2H), 7.55-7.60 (m, 4H); <sup>13</sup>C NMR (75 MHz; CDCl<sub>3</sub>) δ = 55.49, 114.37 (2C), 126.83, 126.91 (2C), 128.32 (2C), 128.89 (2C), 133.76, 141.00, 159.32.

## 2. Synthesis and characterization data for the products 2c-2m

### 3-Methoxybiphenyl (2c) (Table 1, entry 3)

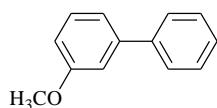

Prepared as described for **2b**, starting from **1c** (1 gm, 0.004 mol) gave, after purification with silica gel column chromatography (Hexane 100%) **2c** as colourless oily liquid (0.668 gm, 85%); <sup>1</sup>H NMR (300 MHz; CDCl<sub>3</sub>) δ = 3.88 (s, 3H), 6.90-6.94 (m, 1H), 7.15-7.22 (m, 1H), 7.35-7.40 (m, 2H), 7.43-7.48 (m, 2H), 7.63 (d, *J* = 7.8 Hz, 2H); <sup>13</sup>C NMR (75 MHz; CDCl<sub>3</sub>) δ = 55.24, 112.64, 112.87, 119.64, 127.15 (2C), 127.36, 128.68 (2C), 129.70, 141.07, 142.74, 159.91.

### 1-Phenylnaphthalene (2d) (Table 1, entry 4)

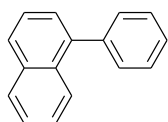

Prepared as described for **2b**, starting from **1d** (1 gm, 0.003 mmol) gave, after purification with silica gel column chromatography (Hexane 100%) **2d** as colourless viscous liquid (0.714 mg, 89%); <sup>1</sup>H NMR (300

MHz; CDCl<sub>3</sub>)  $\delta$  = 7.49-7.63 (m, 9H), 7.93-8.03 (m, 3H); <sup>13</sup>C NMR (75 MHz; CDCl<sub>3</sub>)  $\delta$  = 125.32, 125.70, 125.98 (2C), 126.87, 127.17, 127.58, 128.20 (3C), 130.03 (2C), 131.62, 134.79, 140.24, 140.75.

#### 2-Nitrobiphenyl (2e) (Table 1, entry 5)

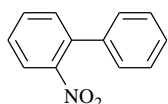

Prepared as described for **2b**, starting from **1e** (5 gm., 0.02 mol) gave, after purification with silica gel column chromatography (Hexane:EtOAc::98:2) **2e** as yellow viscous liquid (3.66 gm., 92%); <sup>1</sup>H NMR (300 MHz; CDCl<sub>3</sub>)  $\delta$  = 7.32-7.35 (m, 2H), 7.41-7.51 (m, 5H), 7.60-7.65 (m, 1H), 7.86 (d, *J* = 9 Hz, 1H); <sup>13</sup>C NMR (75 MHz; CDCl<sub>3</sub>)  $\delta$  = 123.98, 127.82 (2C), 128.10, 128.15, 128.61 (2C), 131.88, 132.20, 136.25, 137.33, 149.25.

#### 4-Nitrobiphenyl (2f) (Table 1, entry 6)

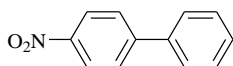

Prepared as described for **2b**, starting from **1f** (5 gm., 0.02 mol) gave, after purification with silica gel column chromatography (Hexane: EtOAc::95:5) **2f** as light yellow crystalline solid (3.54 gm., 89%); mp 113-116 °C; <sup>1</sup>H NMR (300 MHz; CDCl<sub>3</sub>)  $\delta$  = 7.42-7.53 (m, 3H), 7.65 (d, 2H, *J* = 6 Hz), 7.73 (d, 2H, *J* = 9 Hz), 8.29 (d, 2H, *J* = 9 Hz); <sup>13</sup>C NMR (75 MHz; CDCl<sub>3</sub>)  $\delta$  = 124.04, 127.33, 127.73, 128.86, 129.10, 138.71, 147.06, 147.56.

**4-Methoxybiphenyl (2g) (Table 1, entry 7)** Prepared as described for **2b**, starting from **1g** (5 gm., 0.021 mol) gave, after purification with silica gel column chromatography using hexane to afford **2g** as white crystalline solid (2.74 gm., 71%); melting point and NMR data are same as Table 1, entry 2.

#### 1,4-Diphenylbenzene (**2h**) (Table 1, entry 8)

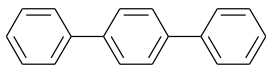

Prepared as described for **2b**, starting from **1h** (5 gm, 0.021 mol) gave, after purification with silica gel column chromatography (Hexane: EtOAc::95:5) **2h** as white crystalline solid (2.20 gm., 60%); mp 209-213 °C; <sup>1</sup>H NMR (300 MHz; CDCl<sub>3</sub>) δ = 7.37-7.42 (m, 2H), 7.47-7.52 (m, 4H), 7.67-7.74 (m, 8H); <sup>13</sup>C NMR (75 MHz; CDCl<sub>3</sub>) δ = 127.04 (4C), 127.33 (2C), 127.49 (4C), 128.80 (4C), 140.14 (2C), 140.73 (2C).

#### 4-Bromobiphenyl (**2h'**) (Table 1, entry 8)

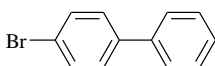

**2h'** was formed with **2h**, starting from **1h** gave, after purification with silica gel column chromatography using hexane to afford **2h'** as colourless oily liquid (0.93 gm., 25%); <sup>1</sup>H NMR (300 MHz; CDCl<sub>3</sub>) δ = 7.36-7.39 (m, 1H), 7.42-7.47 (m, 4H), 7.54-7.62 (m, 4H); <sup>13</sup>C NMR (300 MHz; CDCl<sub>3</sub>) δ = 121.51, 126.92, 127.15, 127.62, 128.73 (2C), 128.88, 131.84 (2C), 133.12, 139.98, 140.11.

**4-Nitrobiphenyl (2i)** (Table 1, entry 9) Prepared as described for **2b**, starting from **1i** (5 gm., 0.024 mol) gave, after purification with silica gel column chromatography (Hexane:EtOAc::95:5) **2i** as light yellow crystalline solid (0.807 gm, 82%); melting point and NMR data are same as 2f (Table 1, entry 6).

### 2,4-Dinitrobiphenyl (**2j**) (Table 1, entry 10)

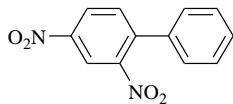

Prepared as described for **2b**, starting from **1j** (5 gm., 0.024 mol) gave, after purification with silica gel column chromatography (Hexane:EtOAc::95:5) **2j** as yellow crystalline solid (3.10 gm., 53%); mp 76-78 °C; <sup>1</sup>H NMR (300 MHz; CDCl<sub>3</sub>) δ = 7.32-7.39 (m, 2H), 7.42-7.57 (m, 3H), 7.68 (d, *J* = 8.7 Hz, 1H), 8.47 (q, *J* = 2.1 Hz, 1H), 8.69 (d, *J* = 2.1 Hz, 1H); <sup>13</sup>C NMR (300 MHz; CDCl<sub>3</sub>) δ = 119.69, 126.41, 127.63 (2C), 129.04 (2C), 129.52, 133.17, 135.16, 142.22, 146.83, 149.06.

**2-Nitrobiphenyl (2k)** (Table 1, entry 11) Prepared as described for **2b**, starting from **1k** (5 gm., 0.031 mol) gave, after purification with silica gel column chromatography (Hexane:EtOAc::98:2) **2k** as yellow viscous liquid (3.82 gm., 62%); NMR data are same as 2e (Table 2, entry 4).

**4-Nitrobiphenyl (2l)** (Table 1, entry 12) Prepared as described for **2b**, starting from **1l** (1 gm., 0.006 mol) gave, after purification with silica gel column chromatography (Hexane:EtOAc::95:5) **2l** as light yellow crystalline solid (1.102 gm, 87%); melting point and NMR data are same as 2f (Table 2, entry 5) .

**4-Methoxybiphenyl (2m)** (Table 1, entry 13) Prepared as described for **2b**, starting from **1m** (5 gm., 0.035 mol) gave, after purification with silica gel column chromatography (Hexane:EtOAc::98:2) **2m** as white crystalline solid (1.67 gm, 26%); melting point and NMR data are same as 2a.

### 3. <sup>1</sup>H and <sup>13</sup>C NMR spectra of products

4-Methylbiphenyl (**2a**) (<sup>1</sup>H NMR in CDCl<sub>3</sub>)

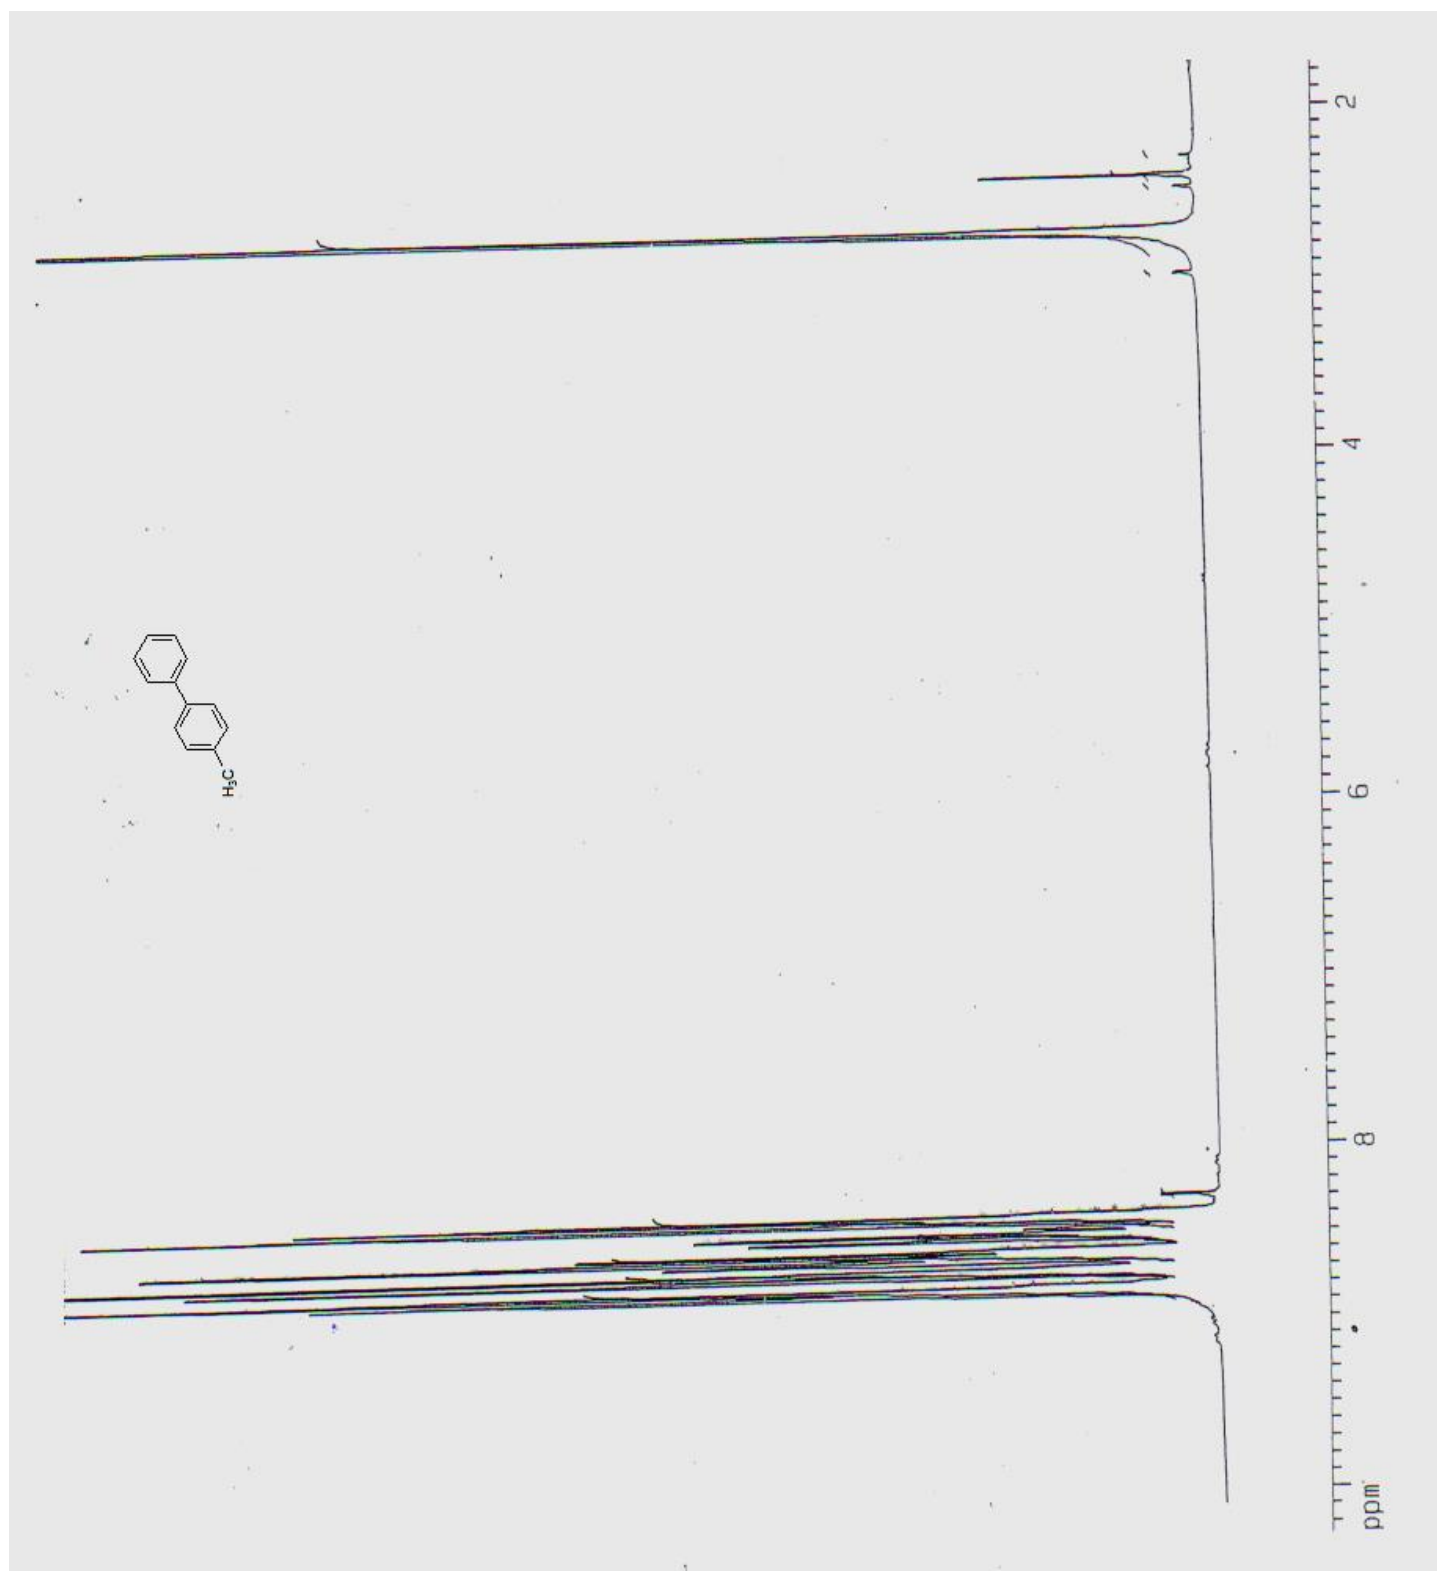

4-Methylbiphenyl (**2a**) ( $^{13}\text{C}$  NMR in  $\text{CDCl}_3$ )



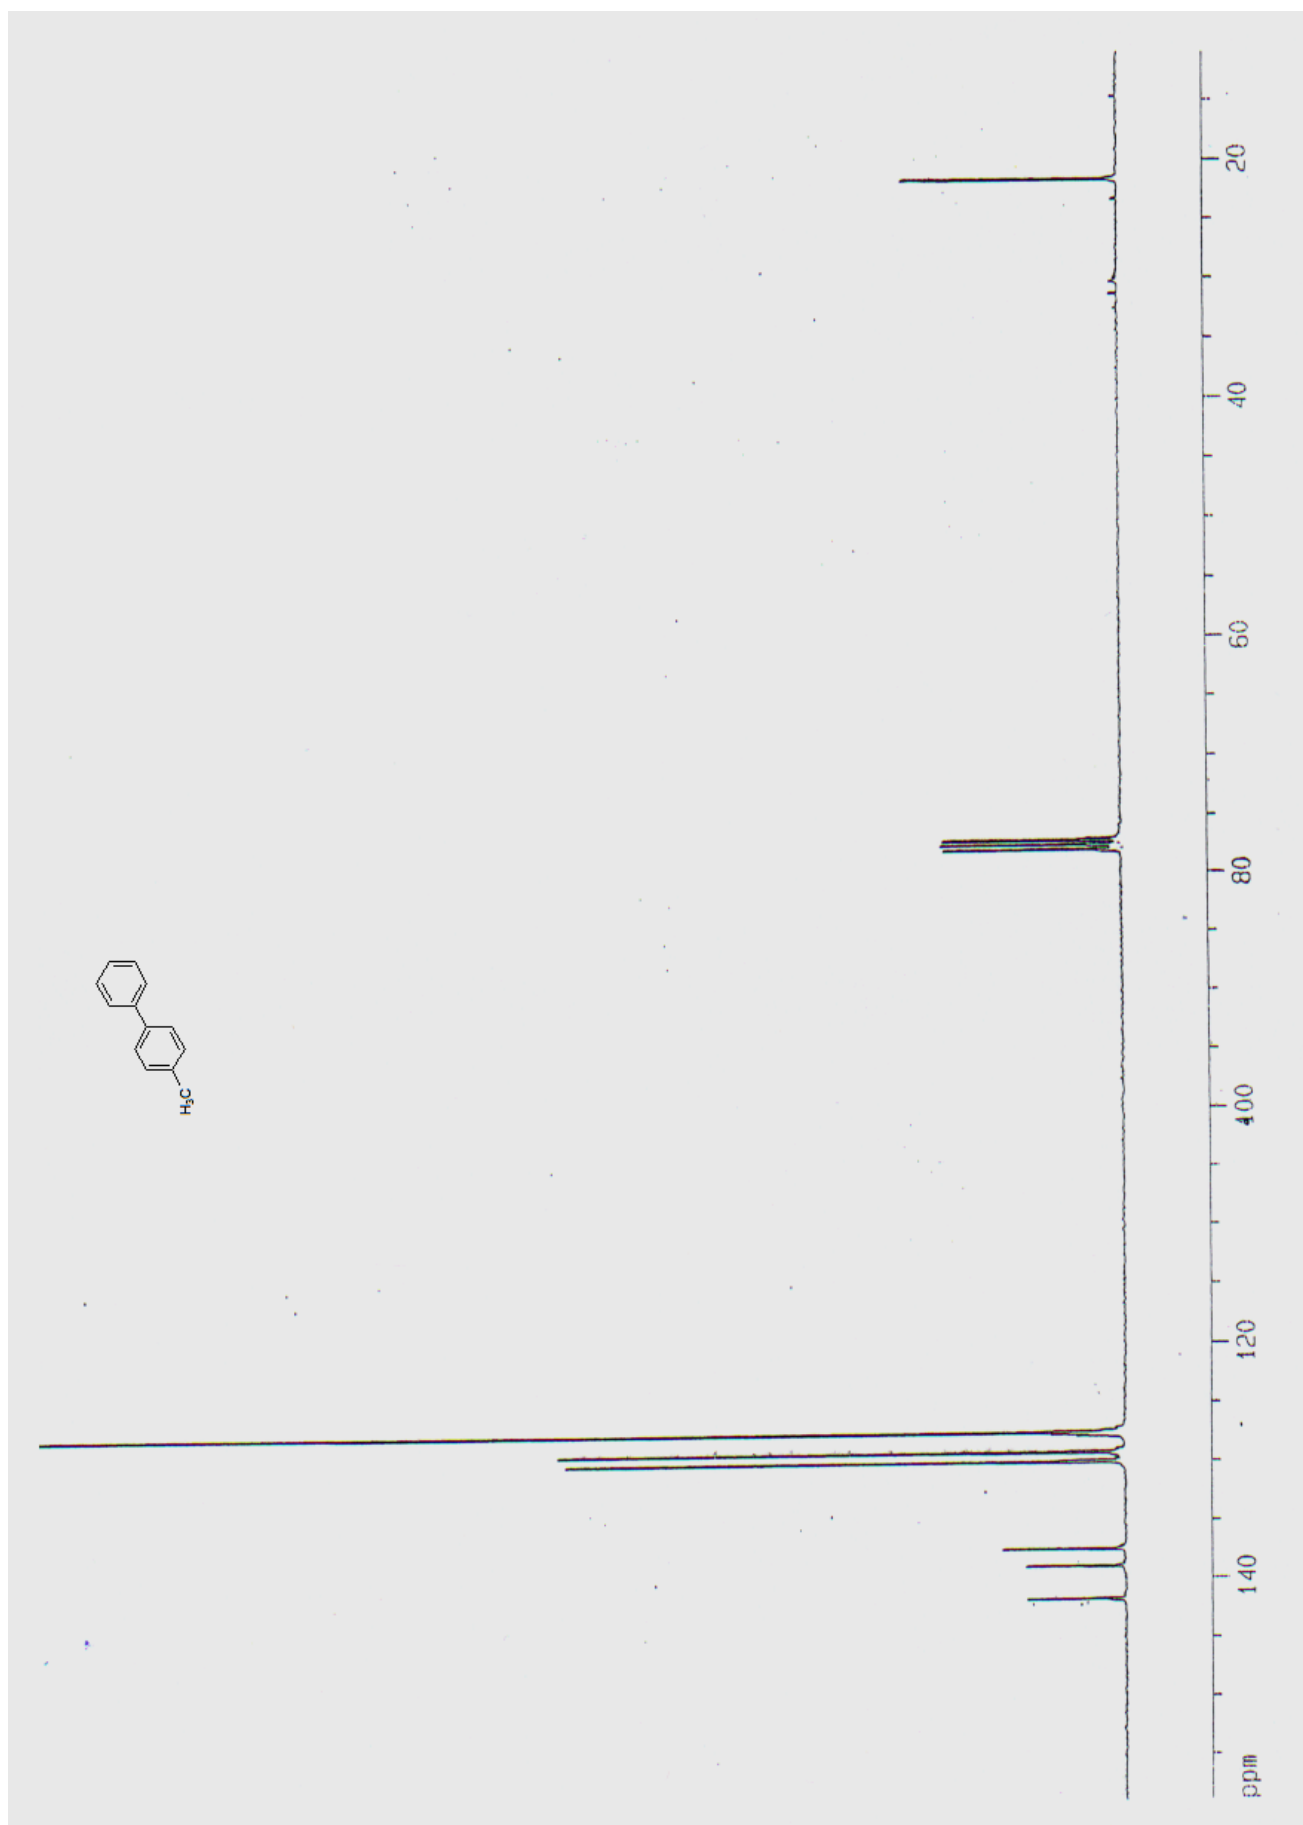

4-Methoxybiphenyl (**2b**) (<sup>1</sup>H NMR in CDCl<sub>3</sub>)

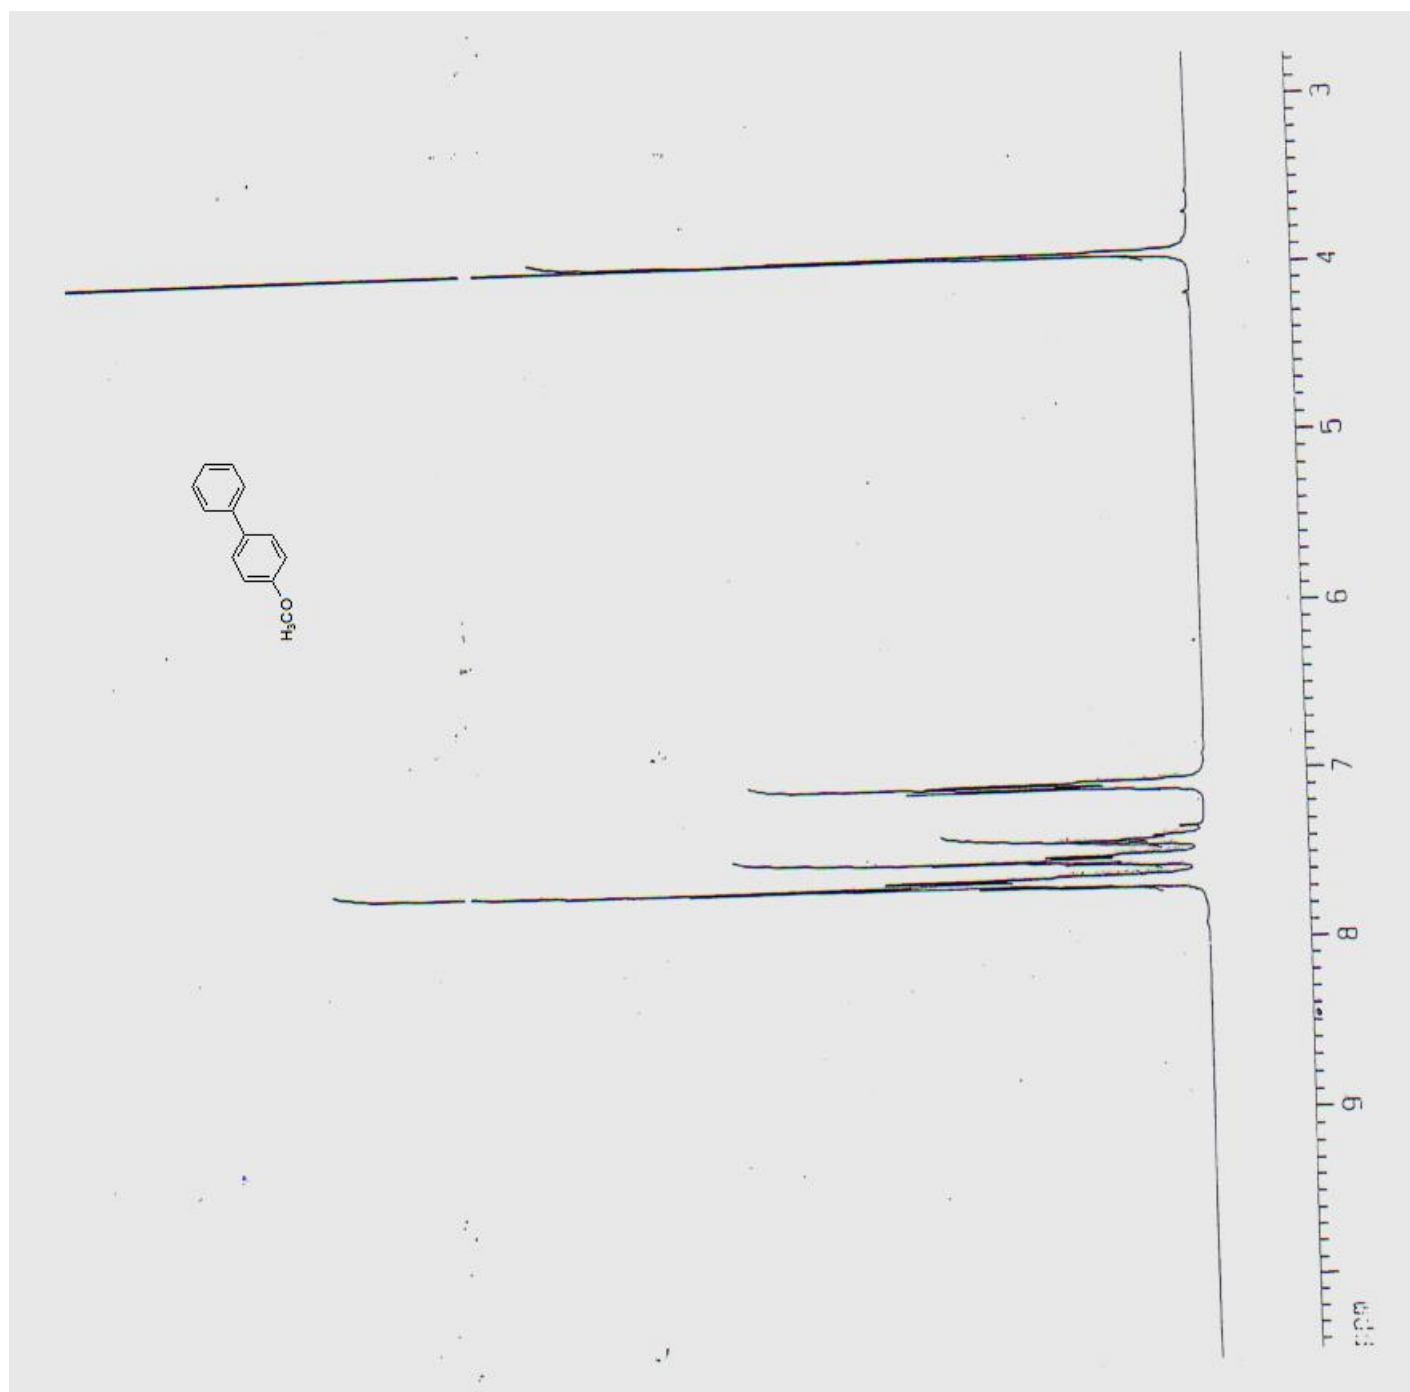

4-Methoxybiphenyl (**2b**) ( $^{13}\text{C}$  NMR in  $\text{CDCl}_3$ )

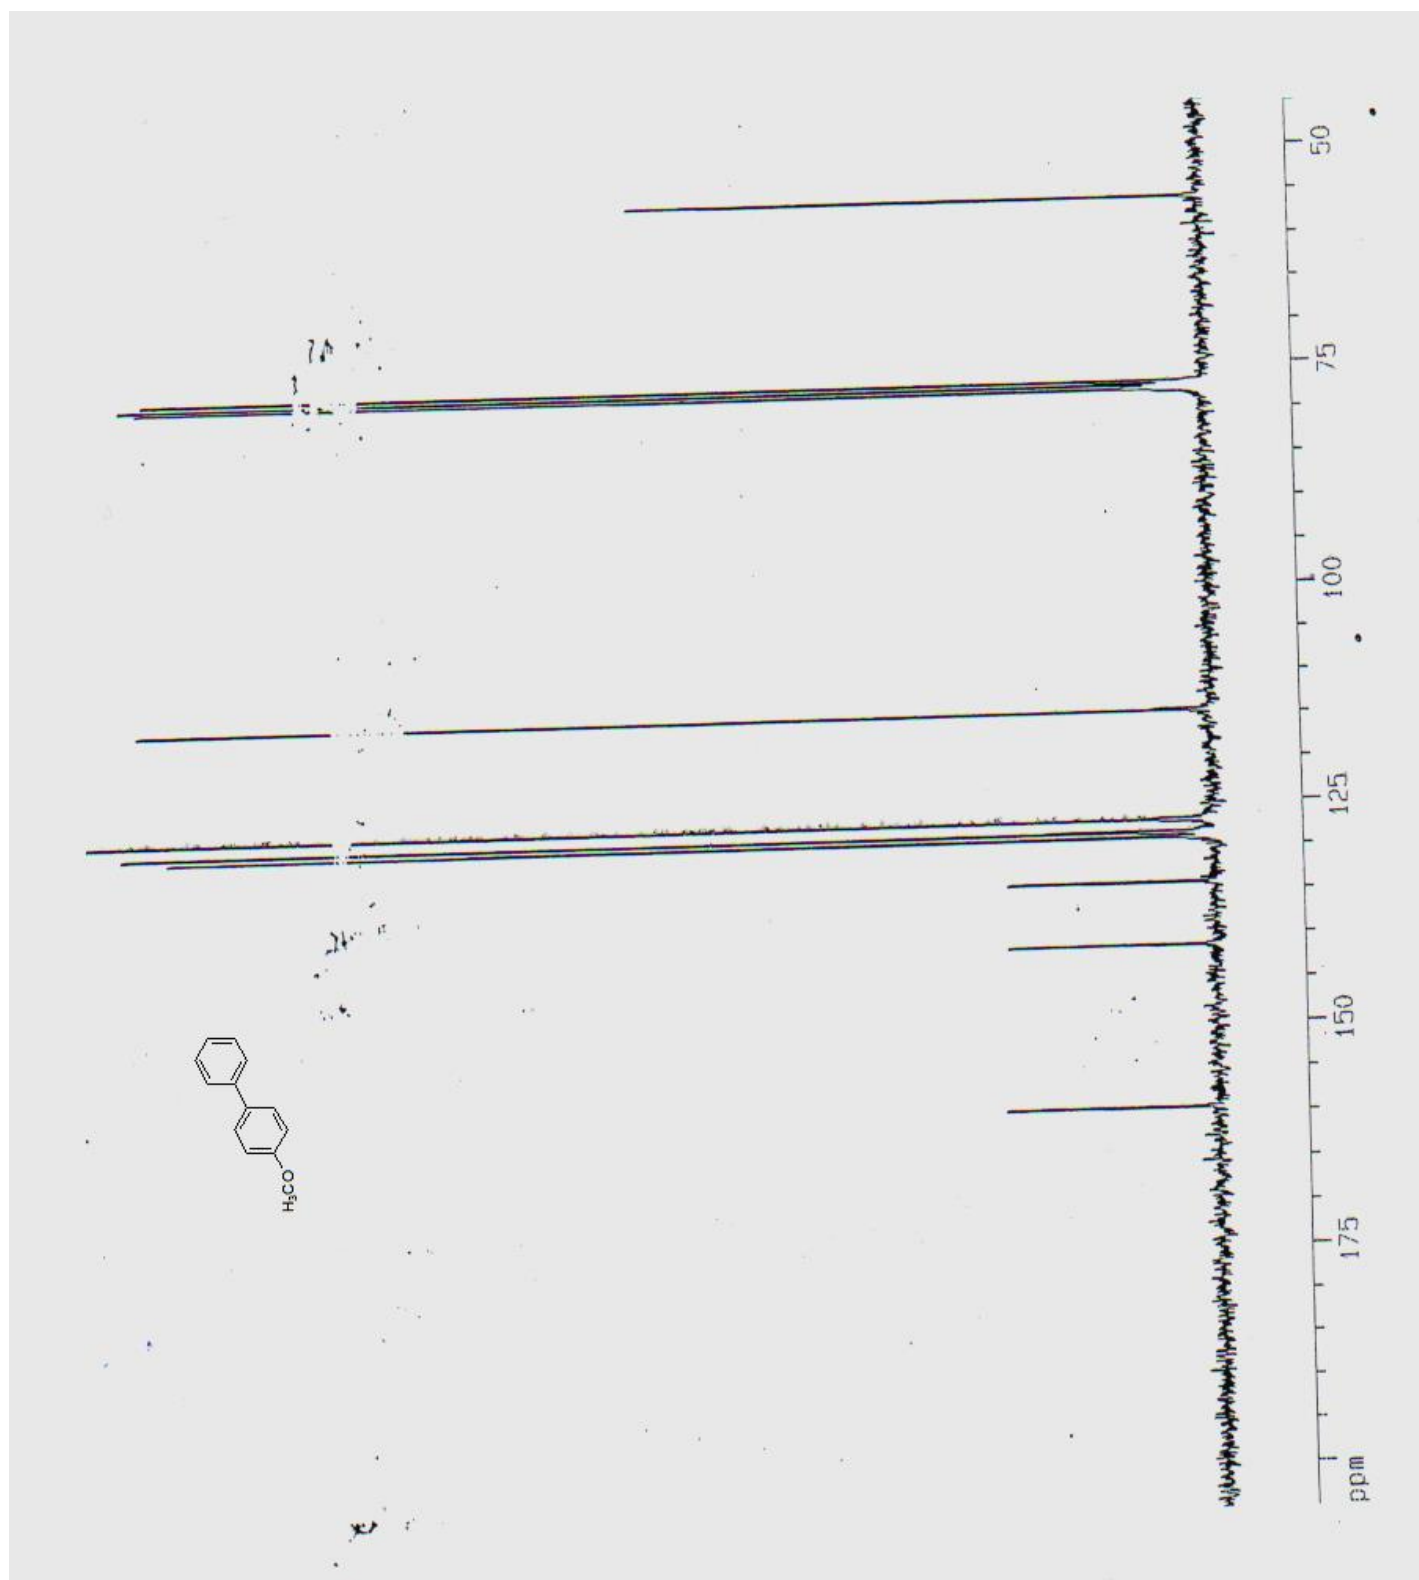

3-Methoxybiphenyl (**2c**) ( $^1\text{H}$  NMR in  $\text{CDCl}_3$ )

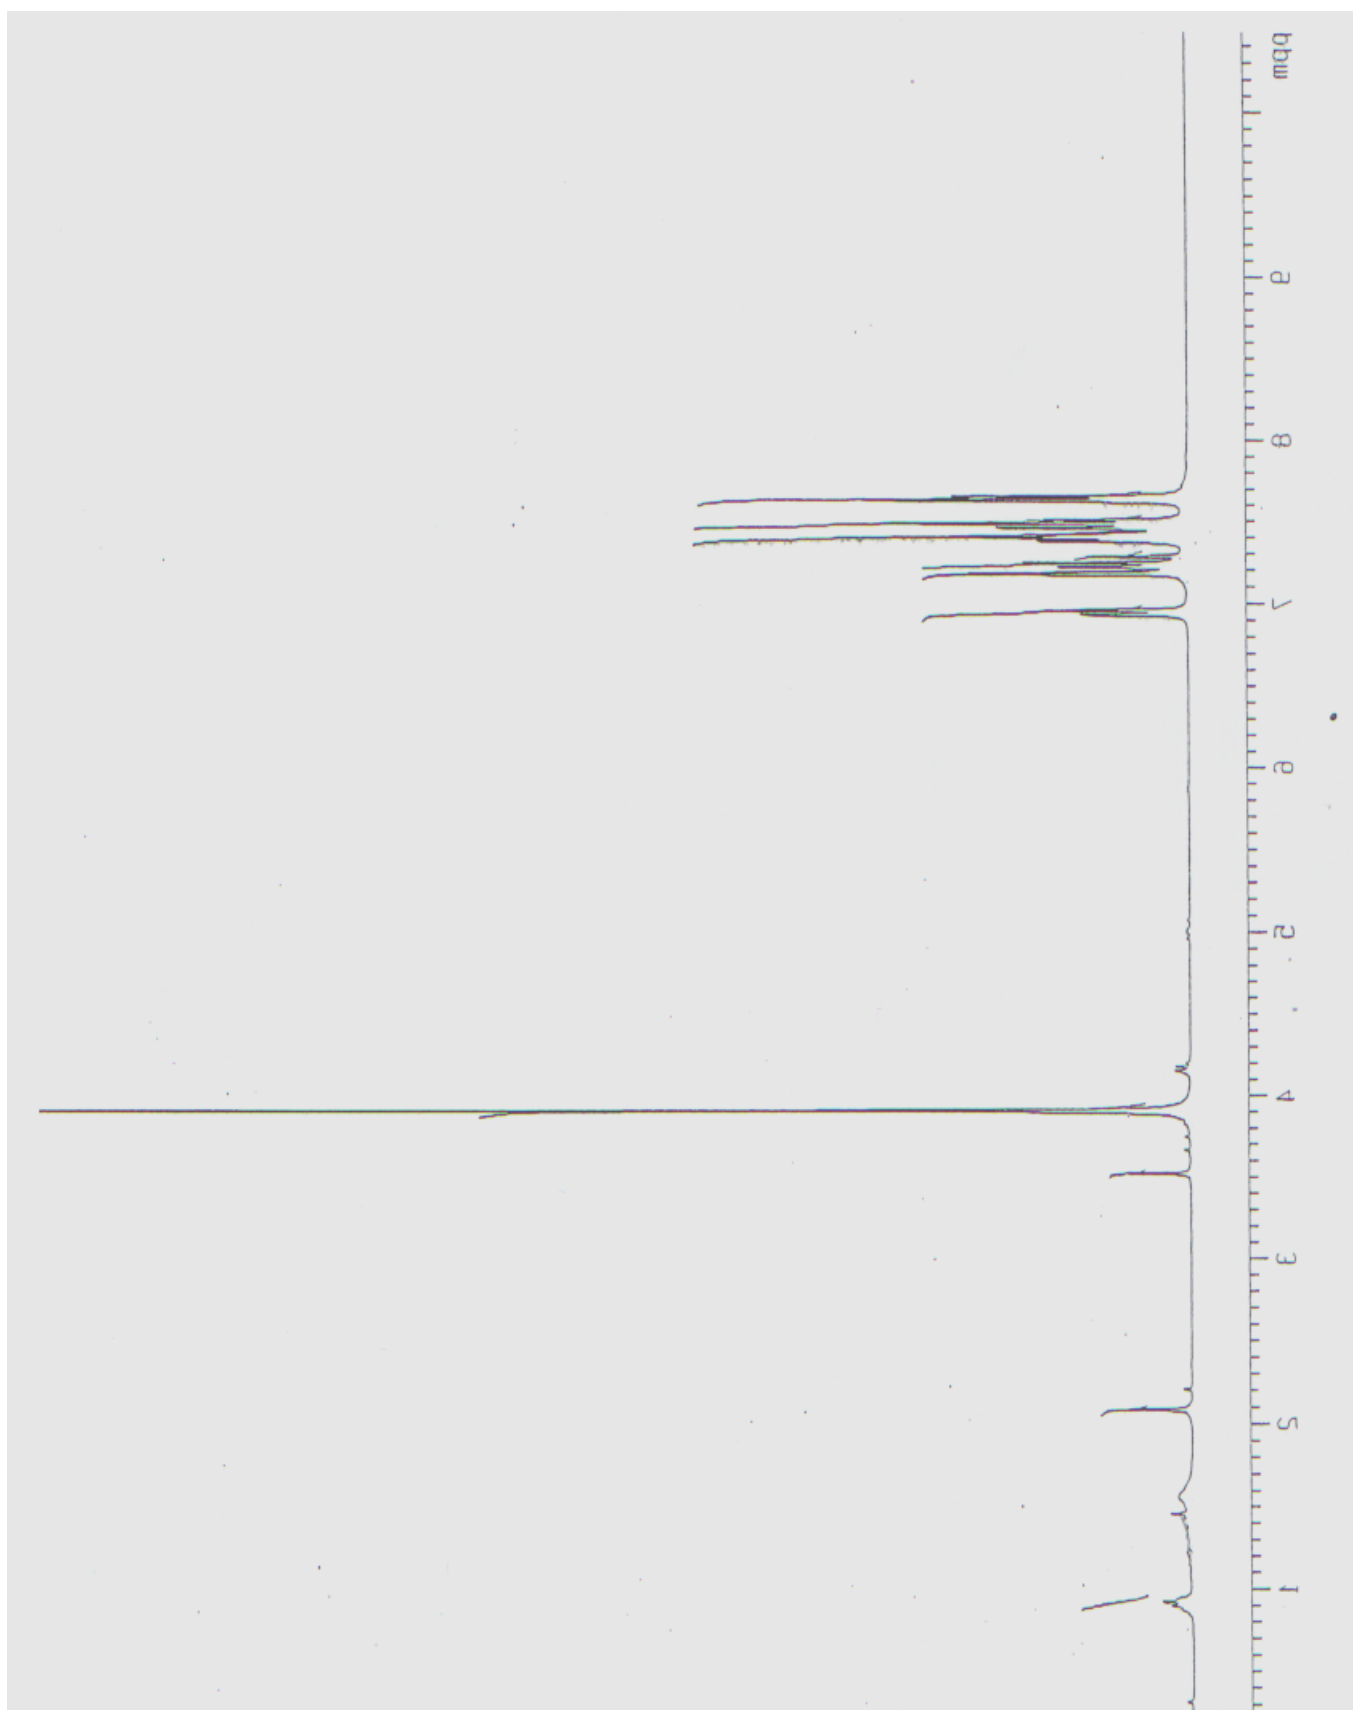

3-Methoxybiphenyl (**2c**) ( $^{13}\text{C}$  NMR in  $\text{CDCl}_3$ )

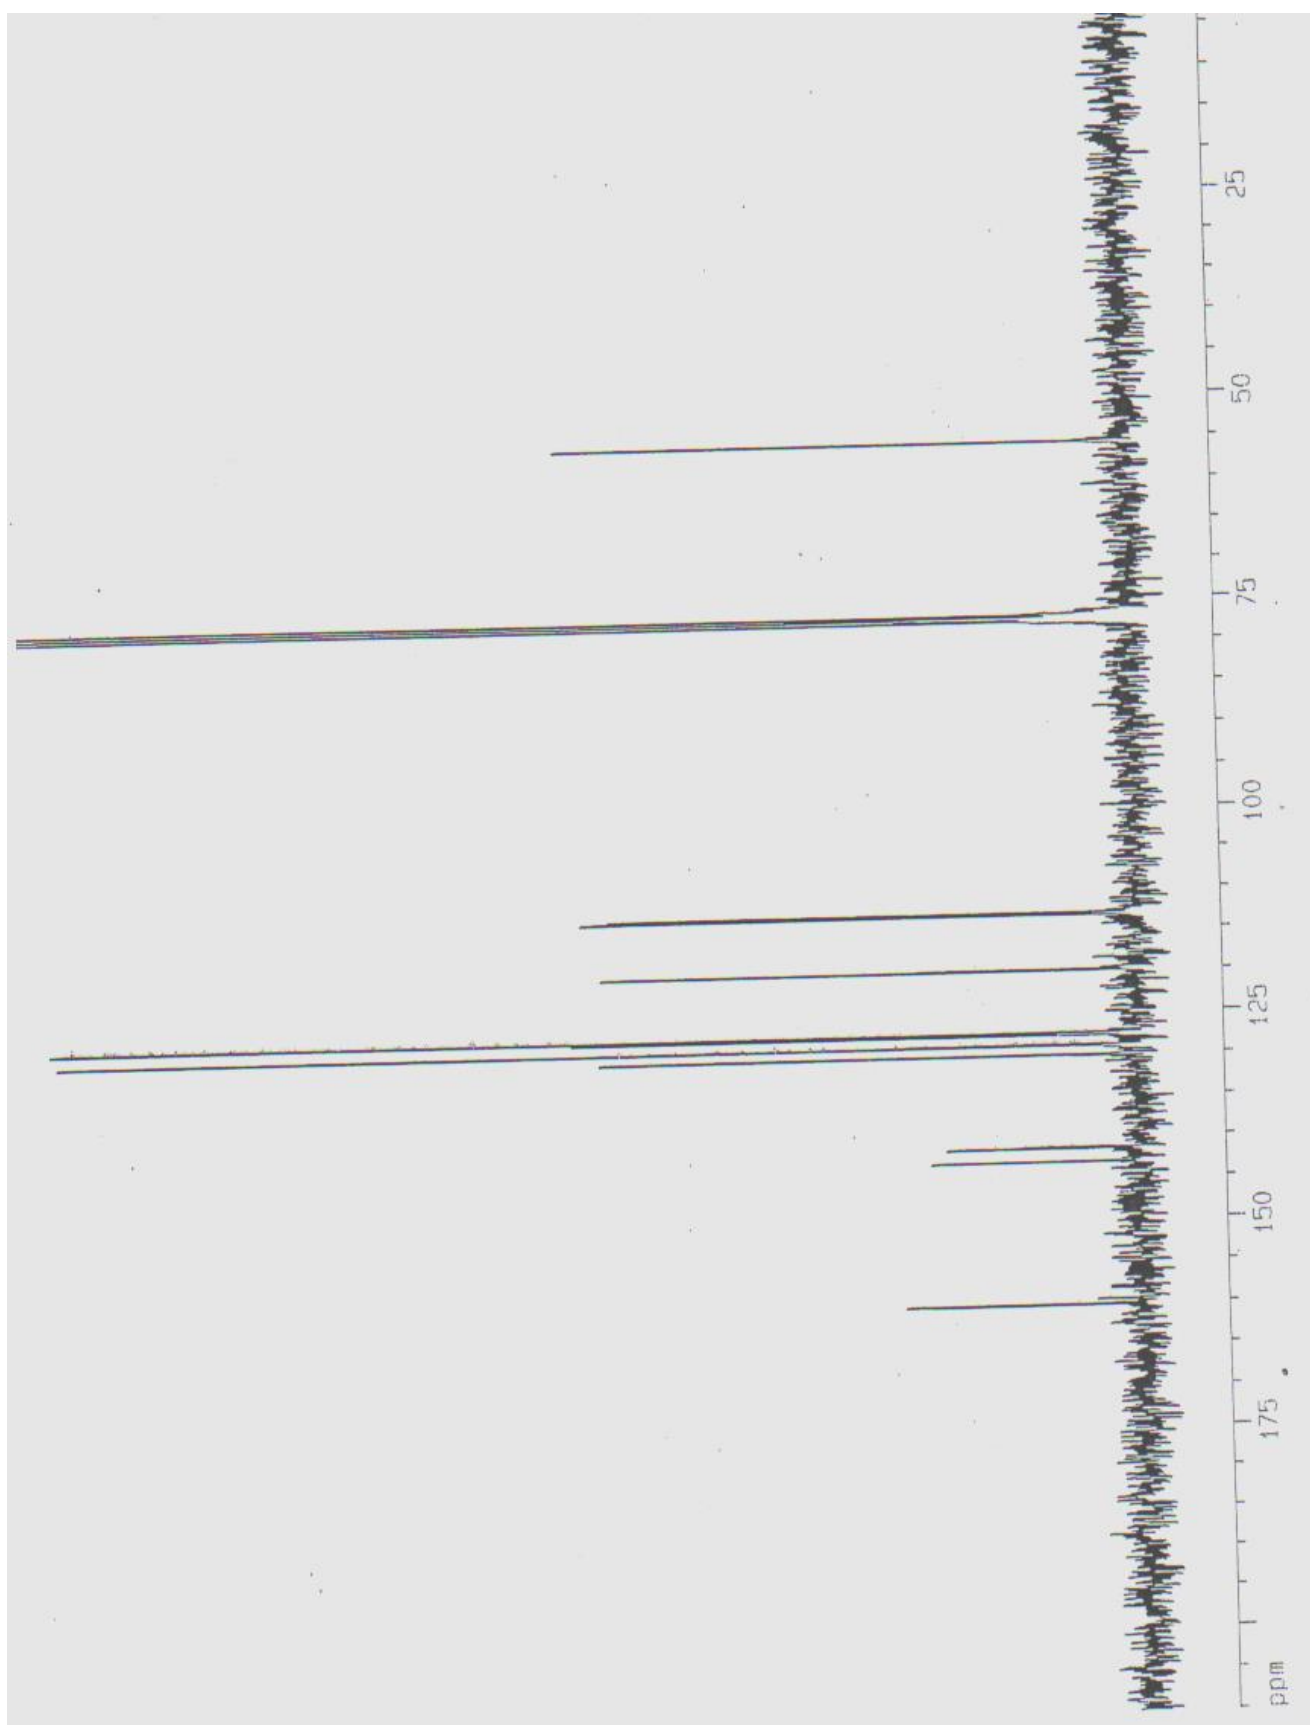

1-Phenylnaphthalene (**2d**) ( $^1\text{H}$  NMR in  $\text{CDCl}_3$ )

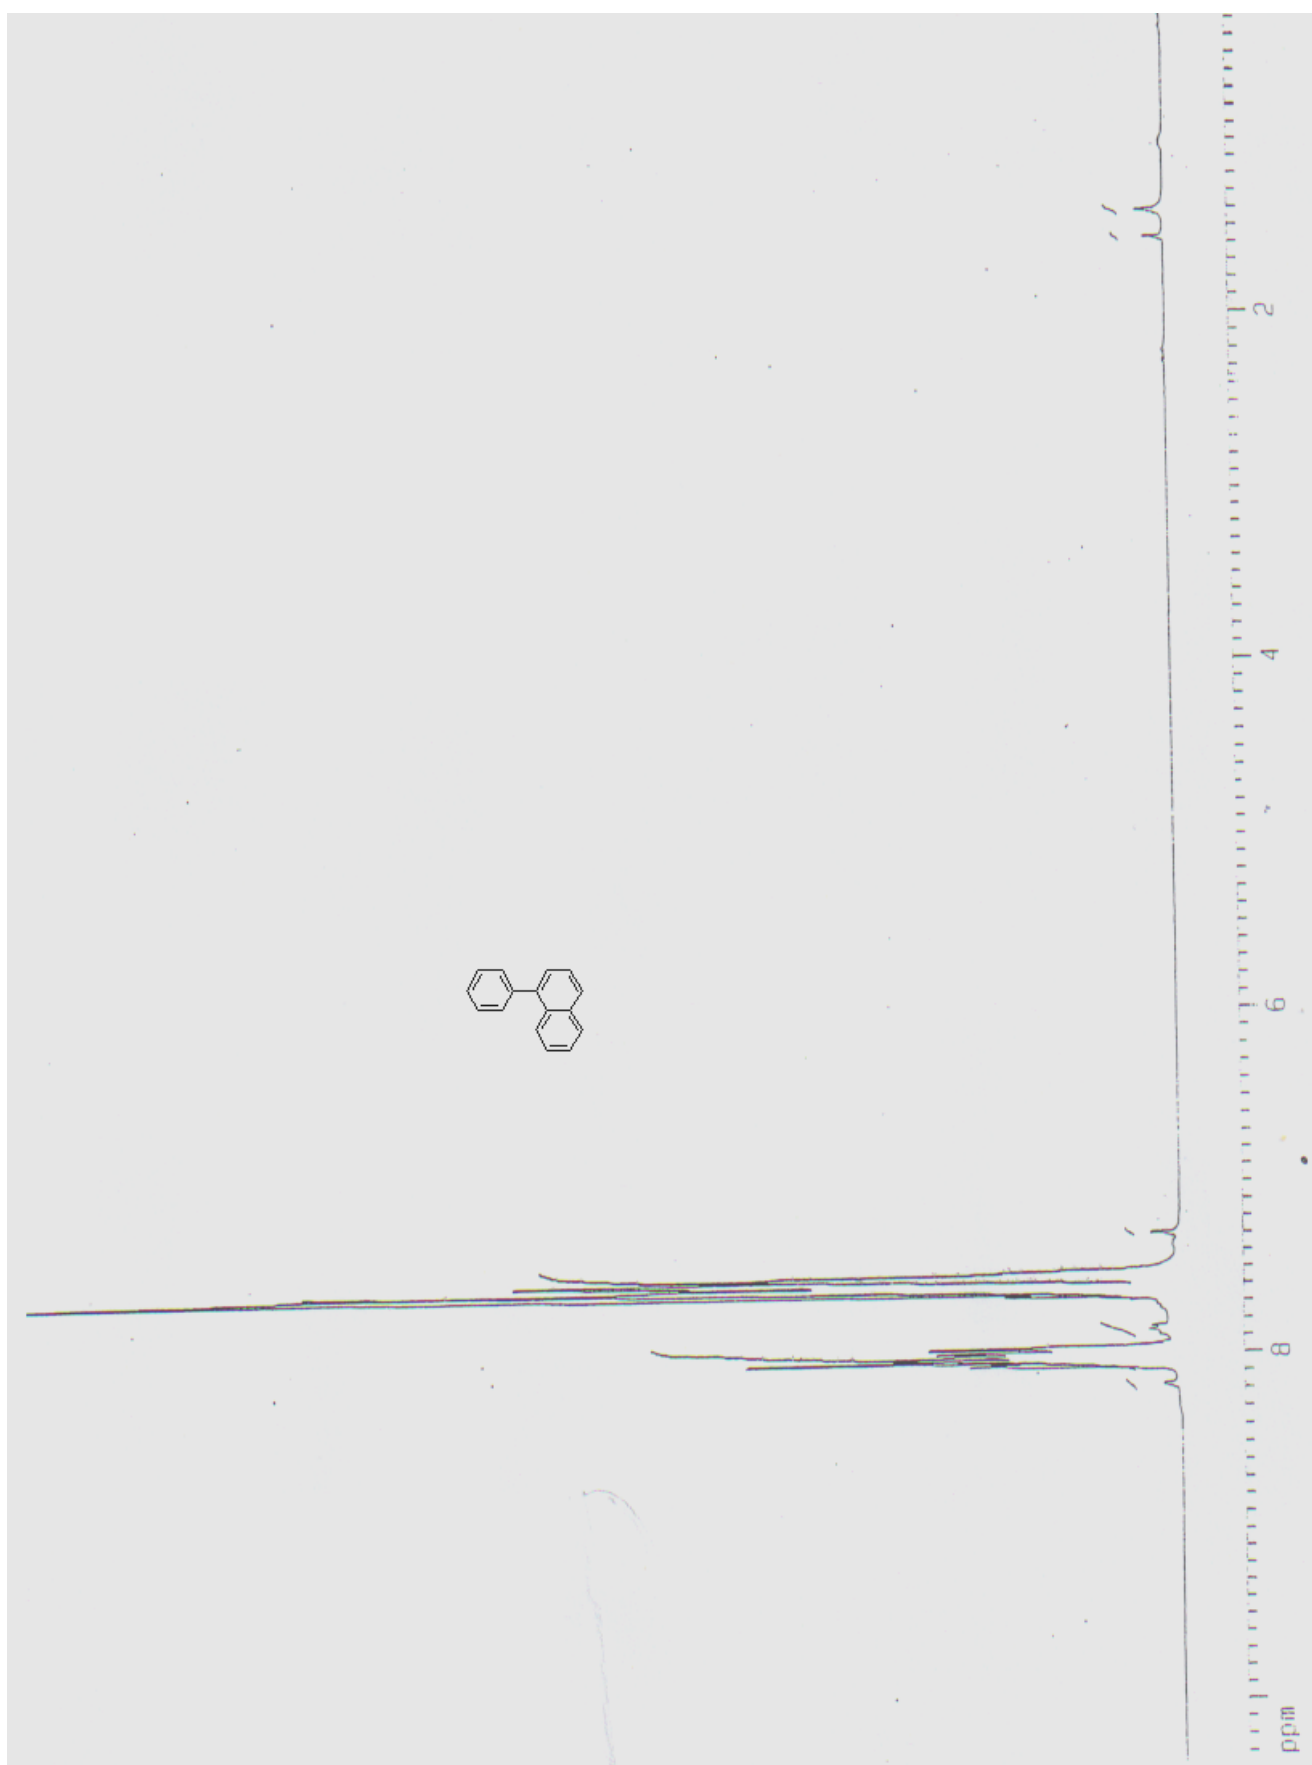

1-Phenylnaphthalene (**2d**) ( $^{13}\text{C}$  NMR in  $\text{CDCl}_3$ )

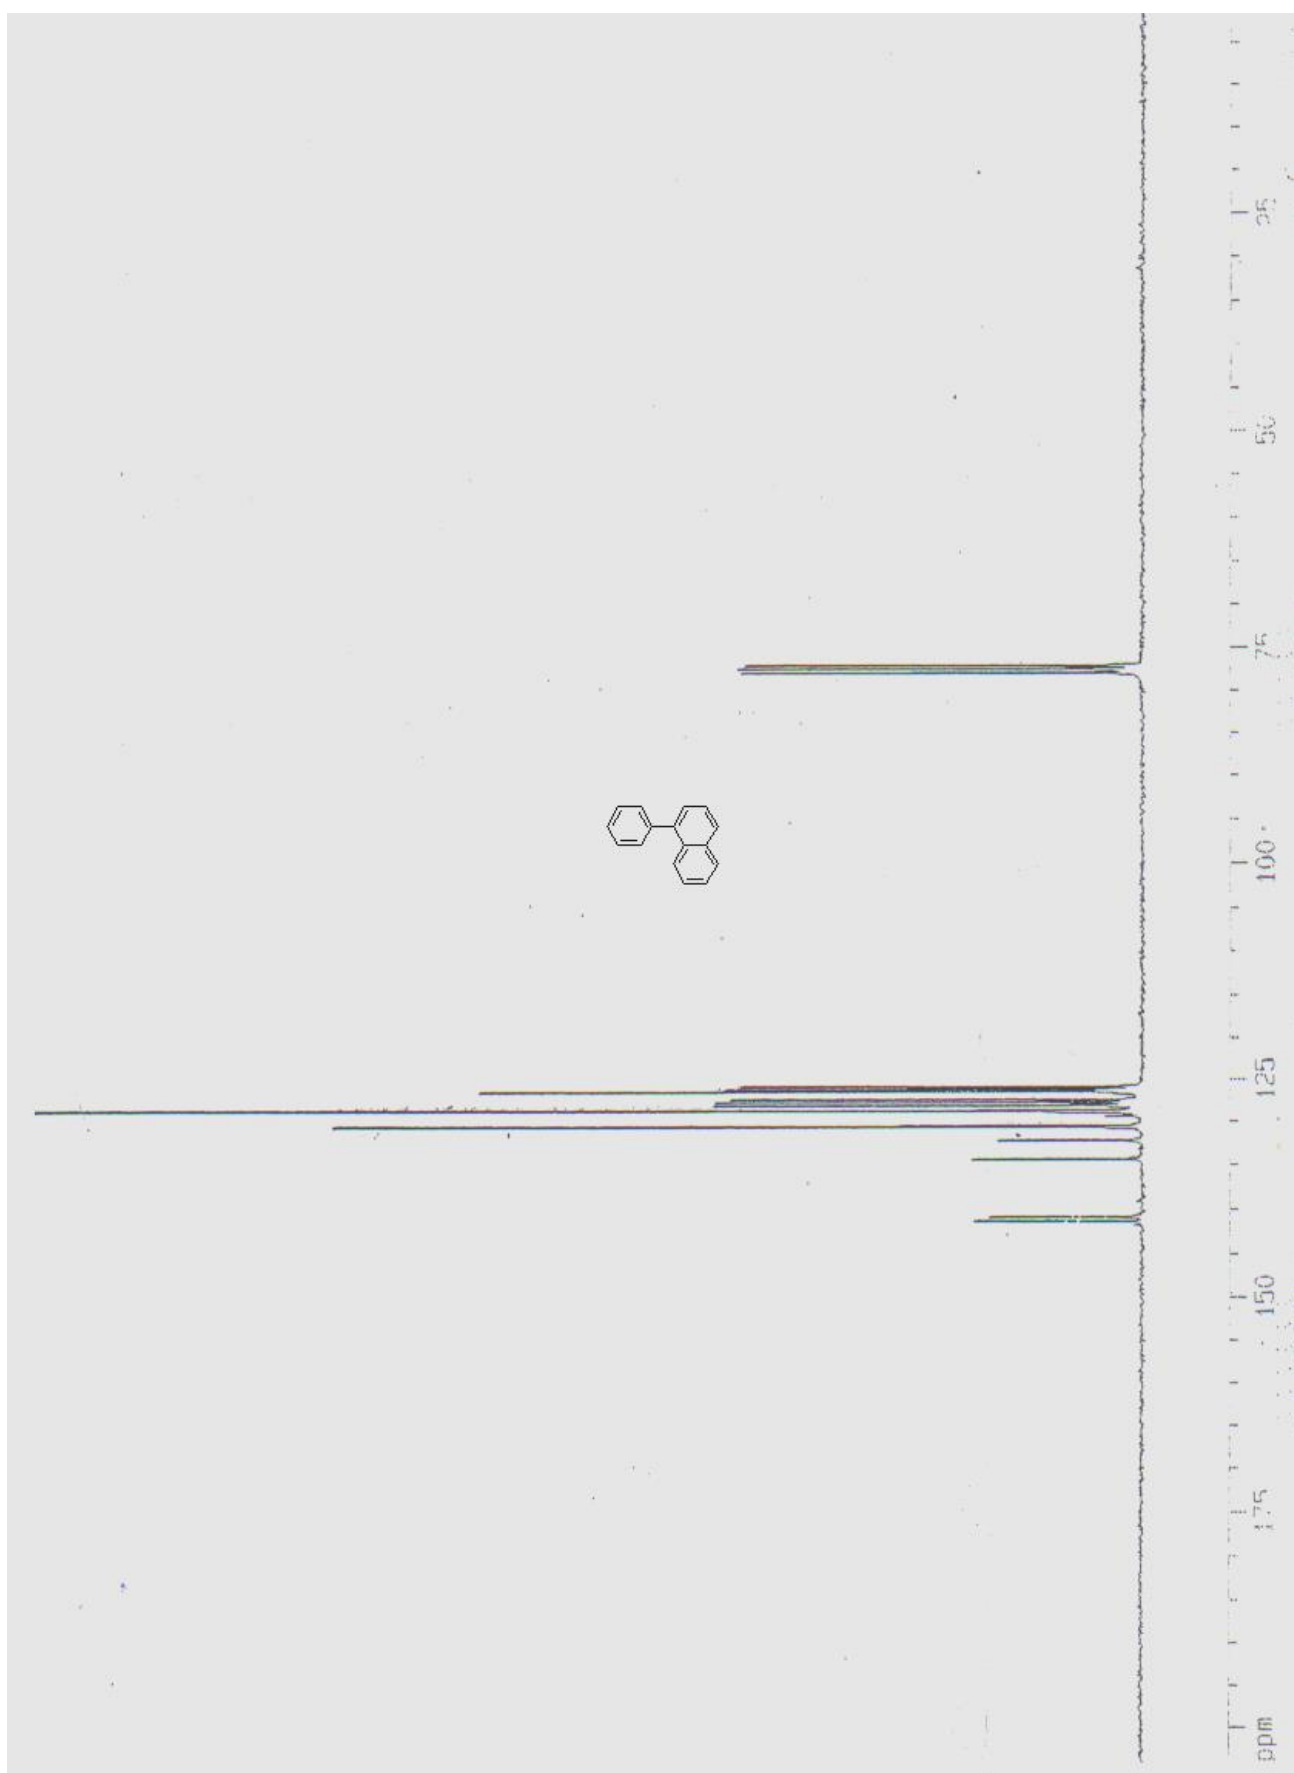

2-Nitrobiphenyl (**2e**) ( $^1\text{H}$  NMR in  $\text{CDCl}_3$ )

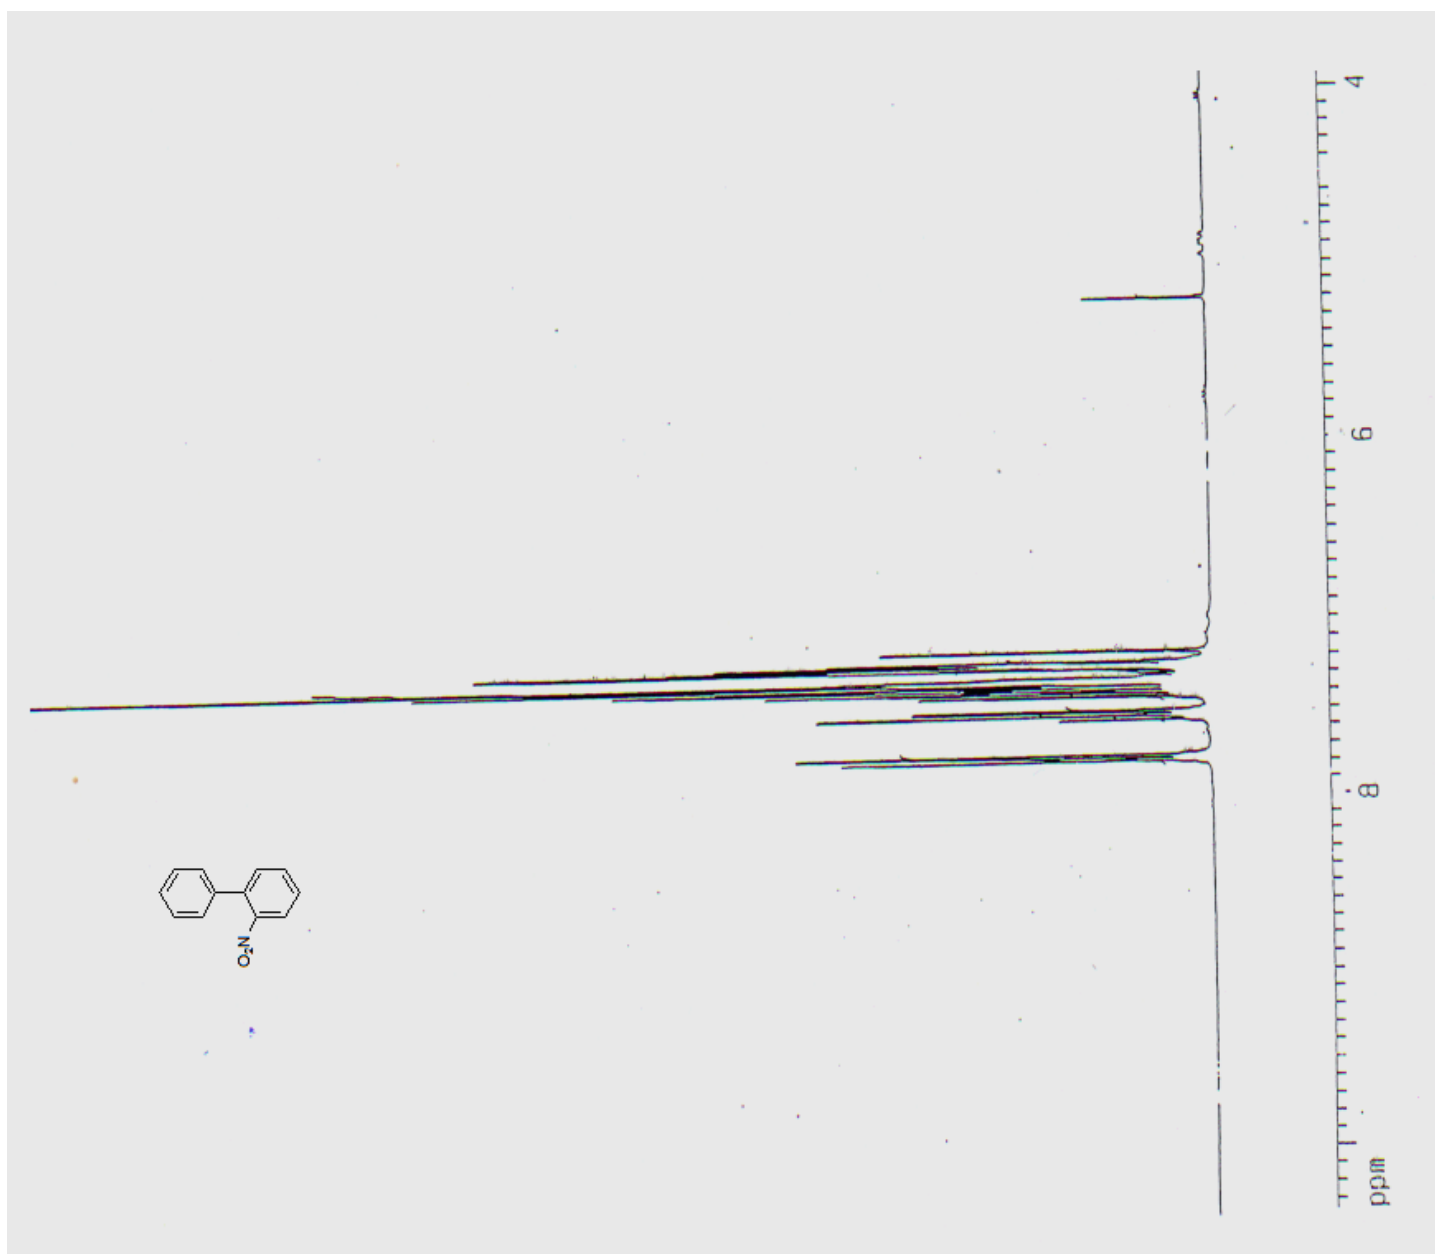



2-Nitrobiphenyl (**2e**) ( $^{13}\text{C}$  NMR in  $\text{CDCl}_3$ )

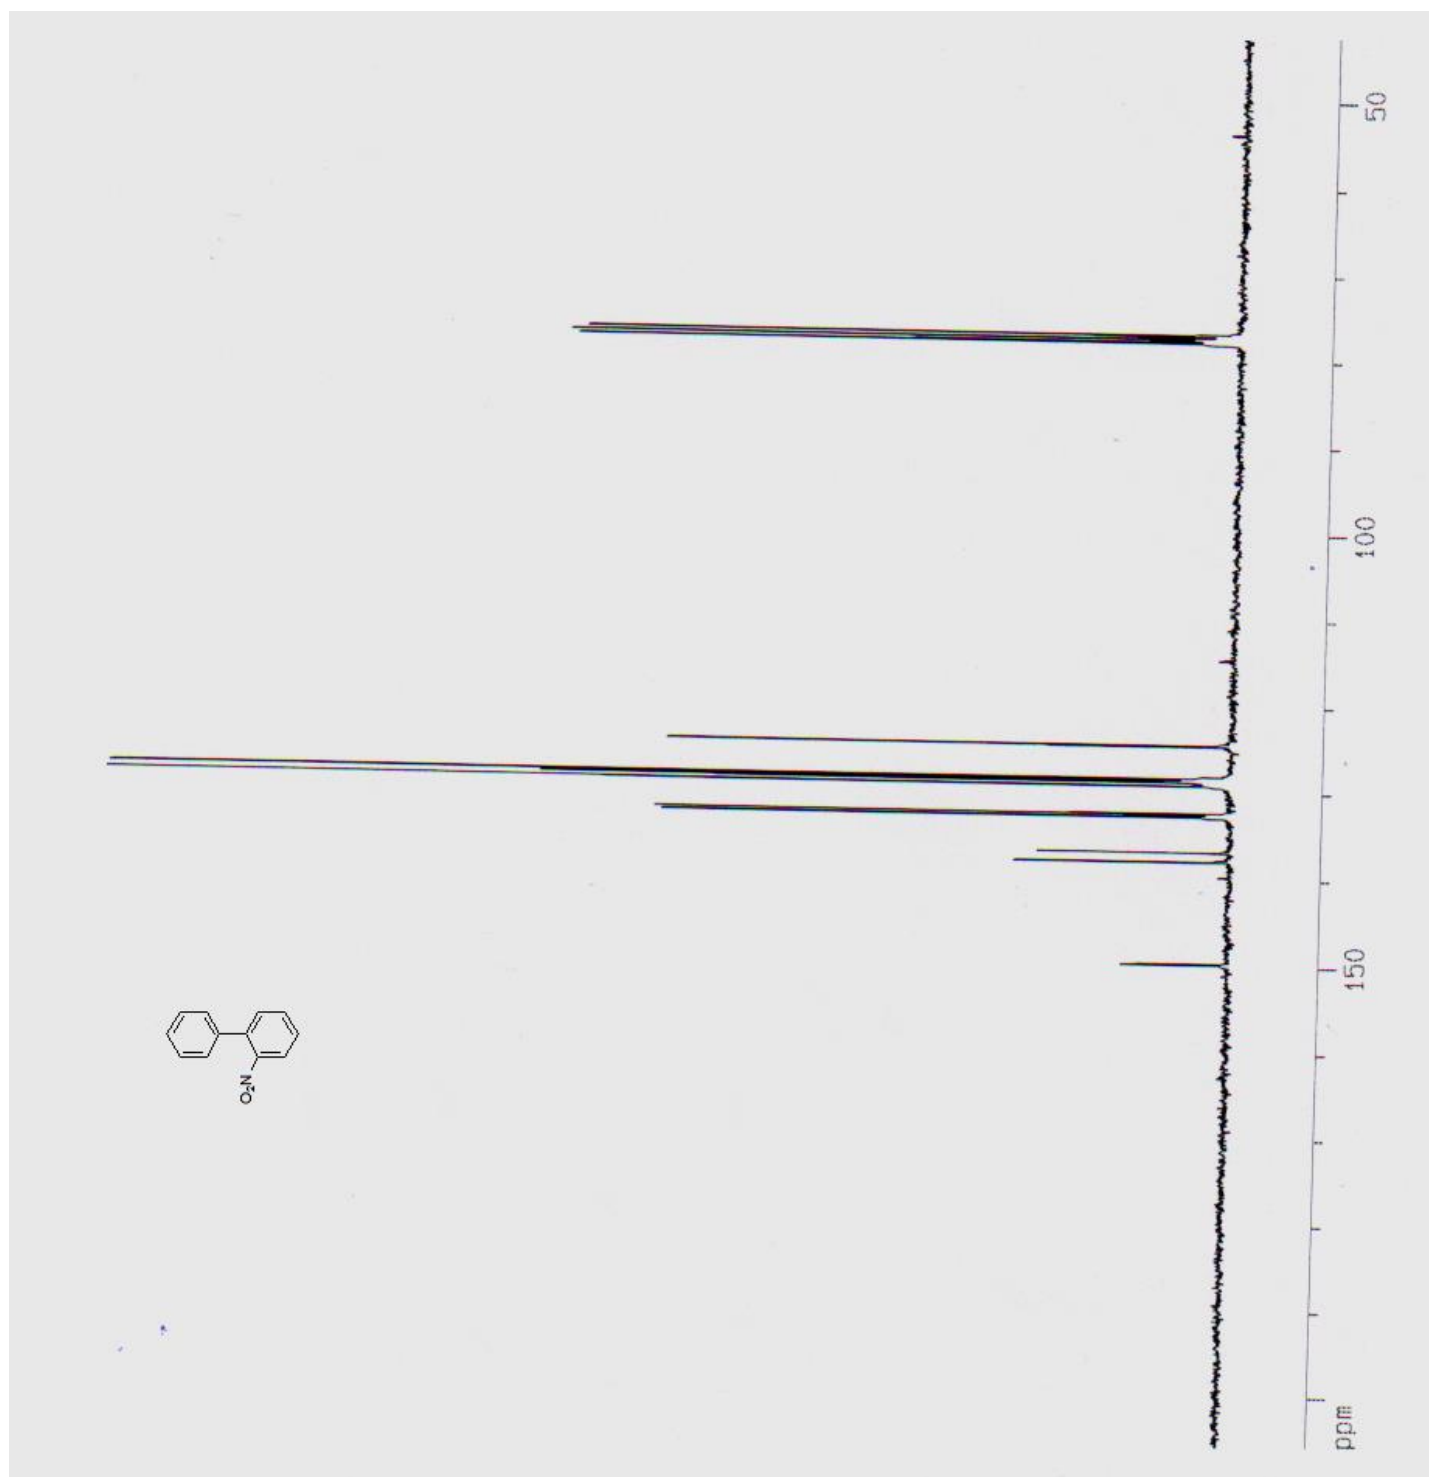

4-Nitrobiphenyl (**2f**) ( $^1\text{H}$  NMR in  $\text{CDCl}_3$ )

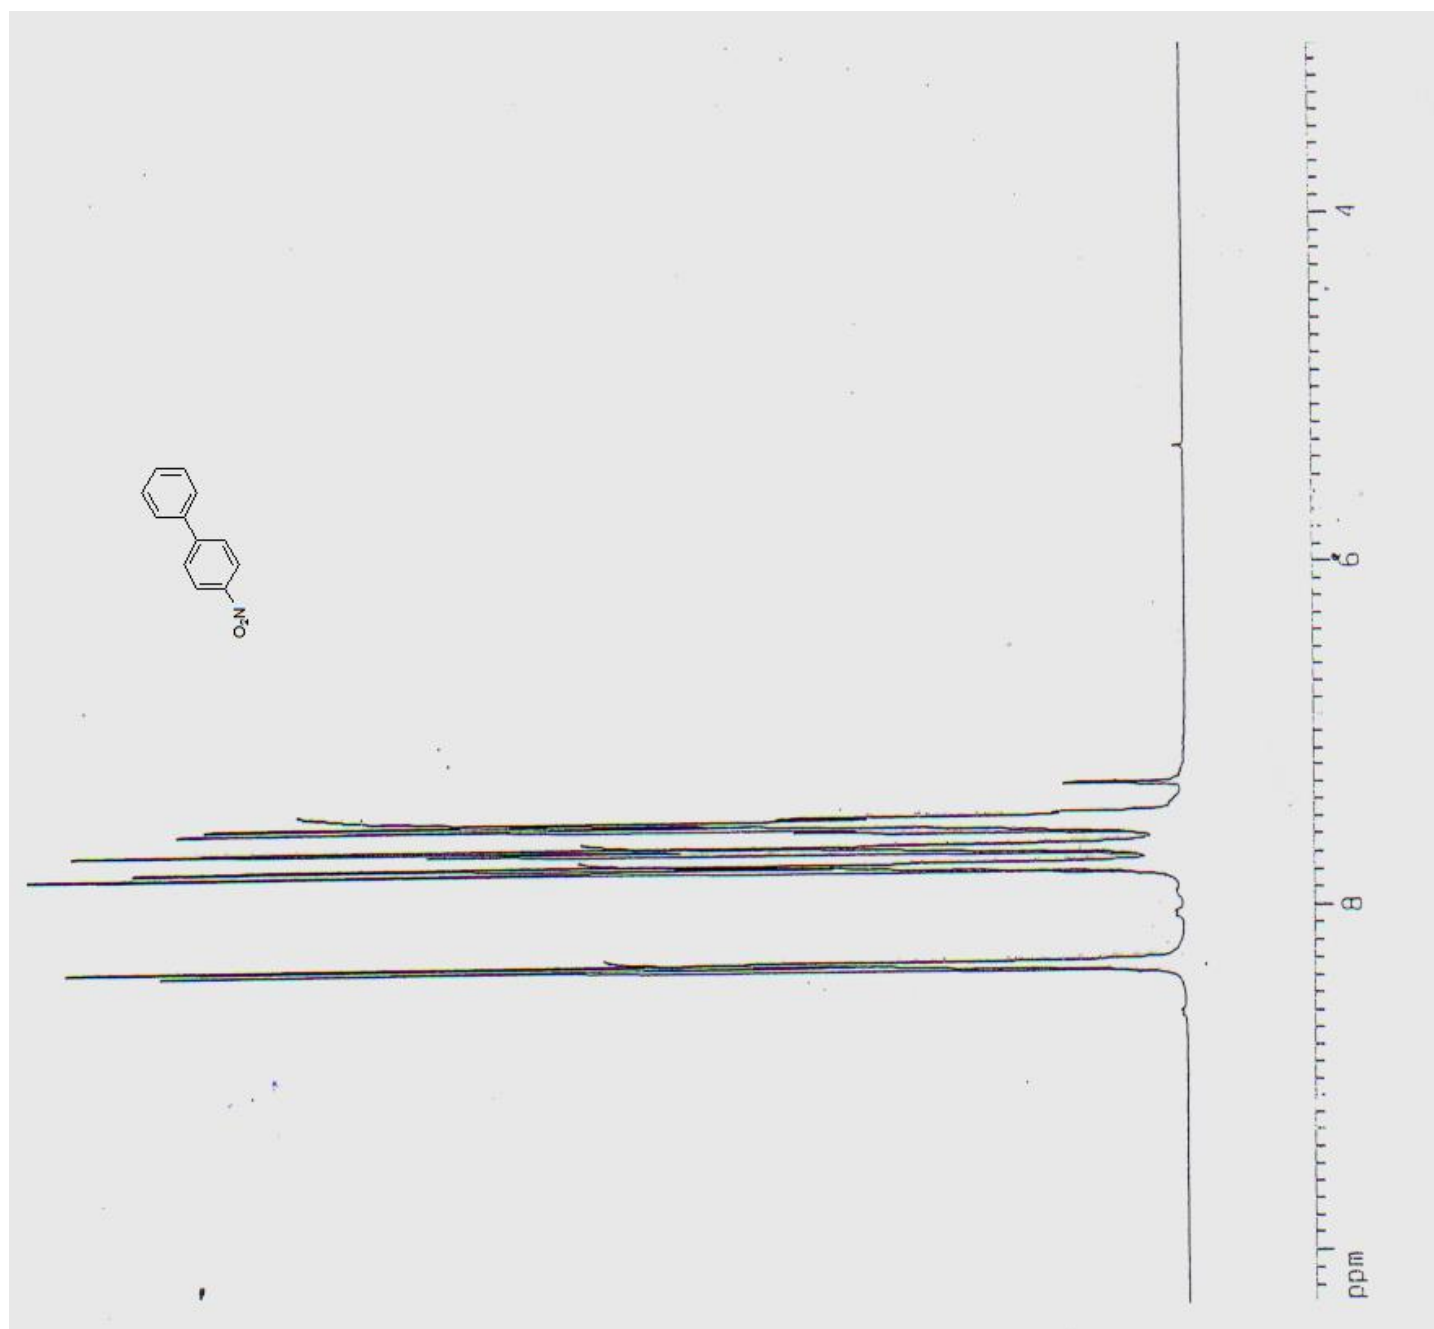

4-Nitrobiphenyl (**2f**) ( $^{13}\text{C}$  NMR in  $\text{CDCl}_3$ )

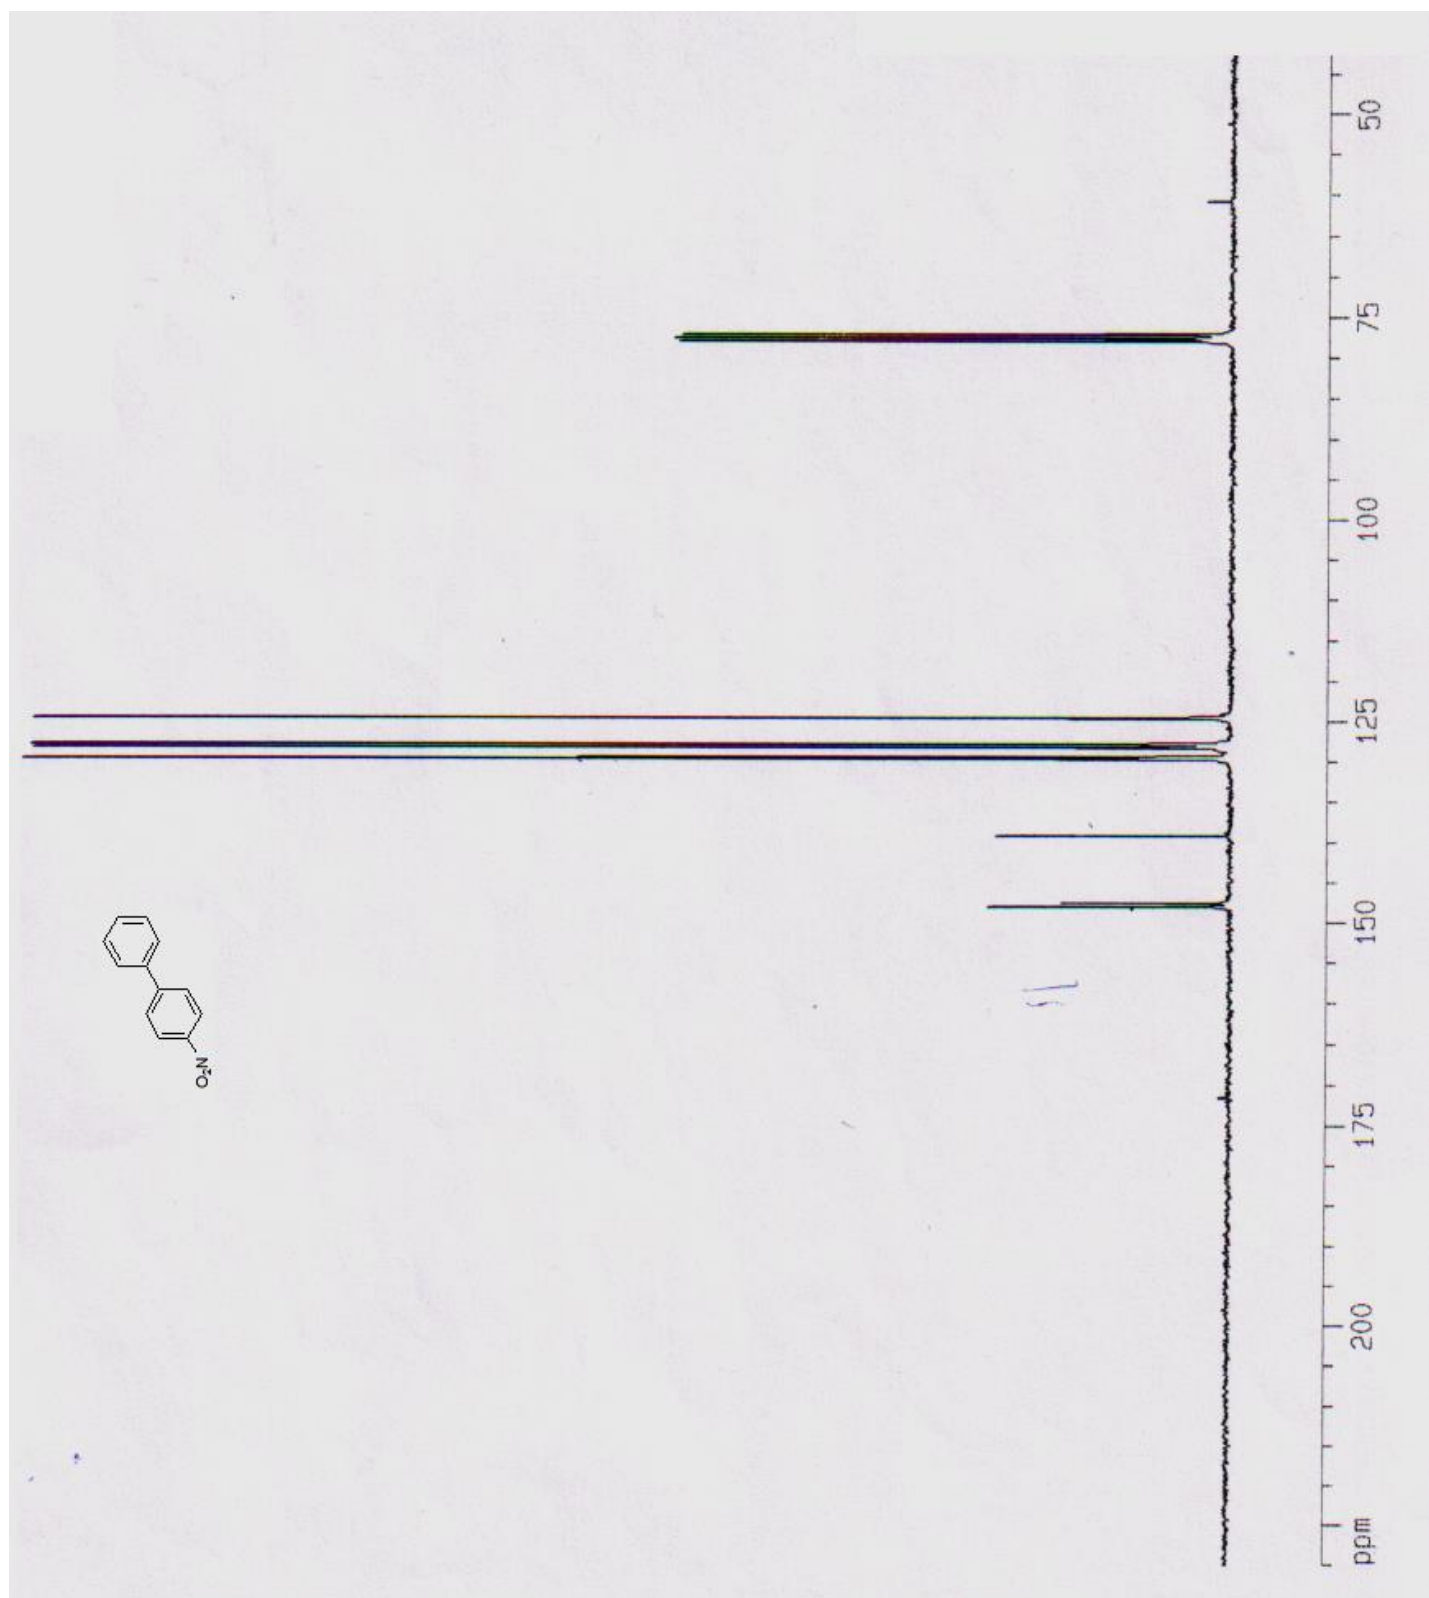

1,4-Diphenylbenzene (**2h**) ( $^1\text{H}$  NMR in  $\text{CDCl}_3$ )

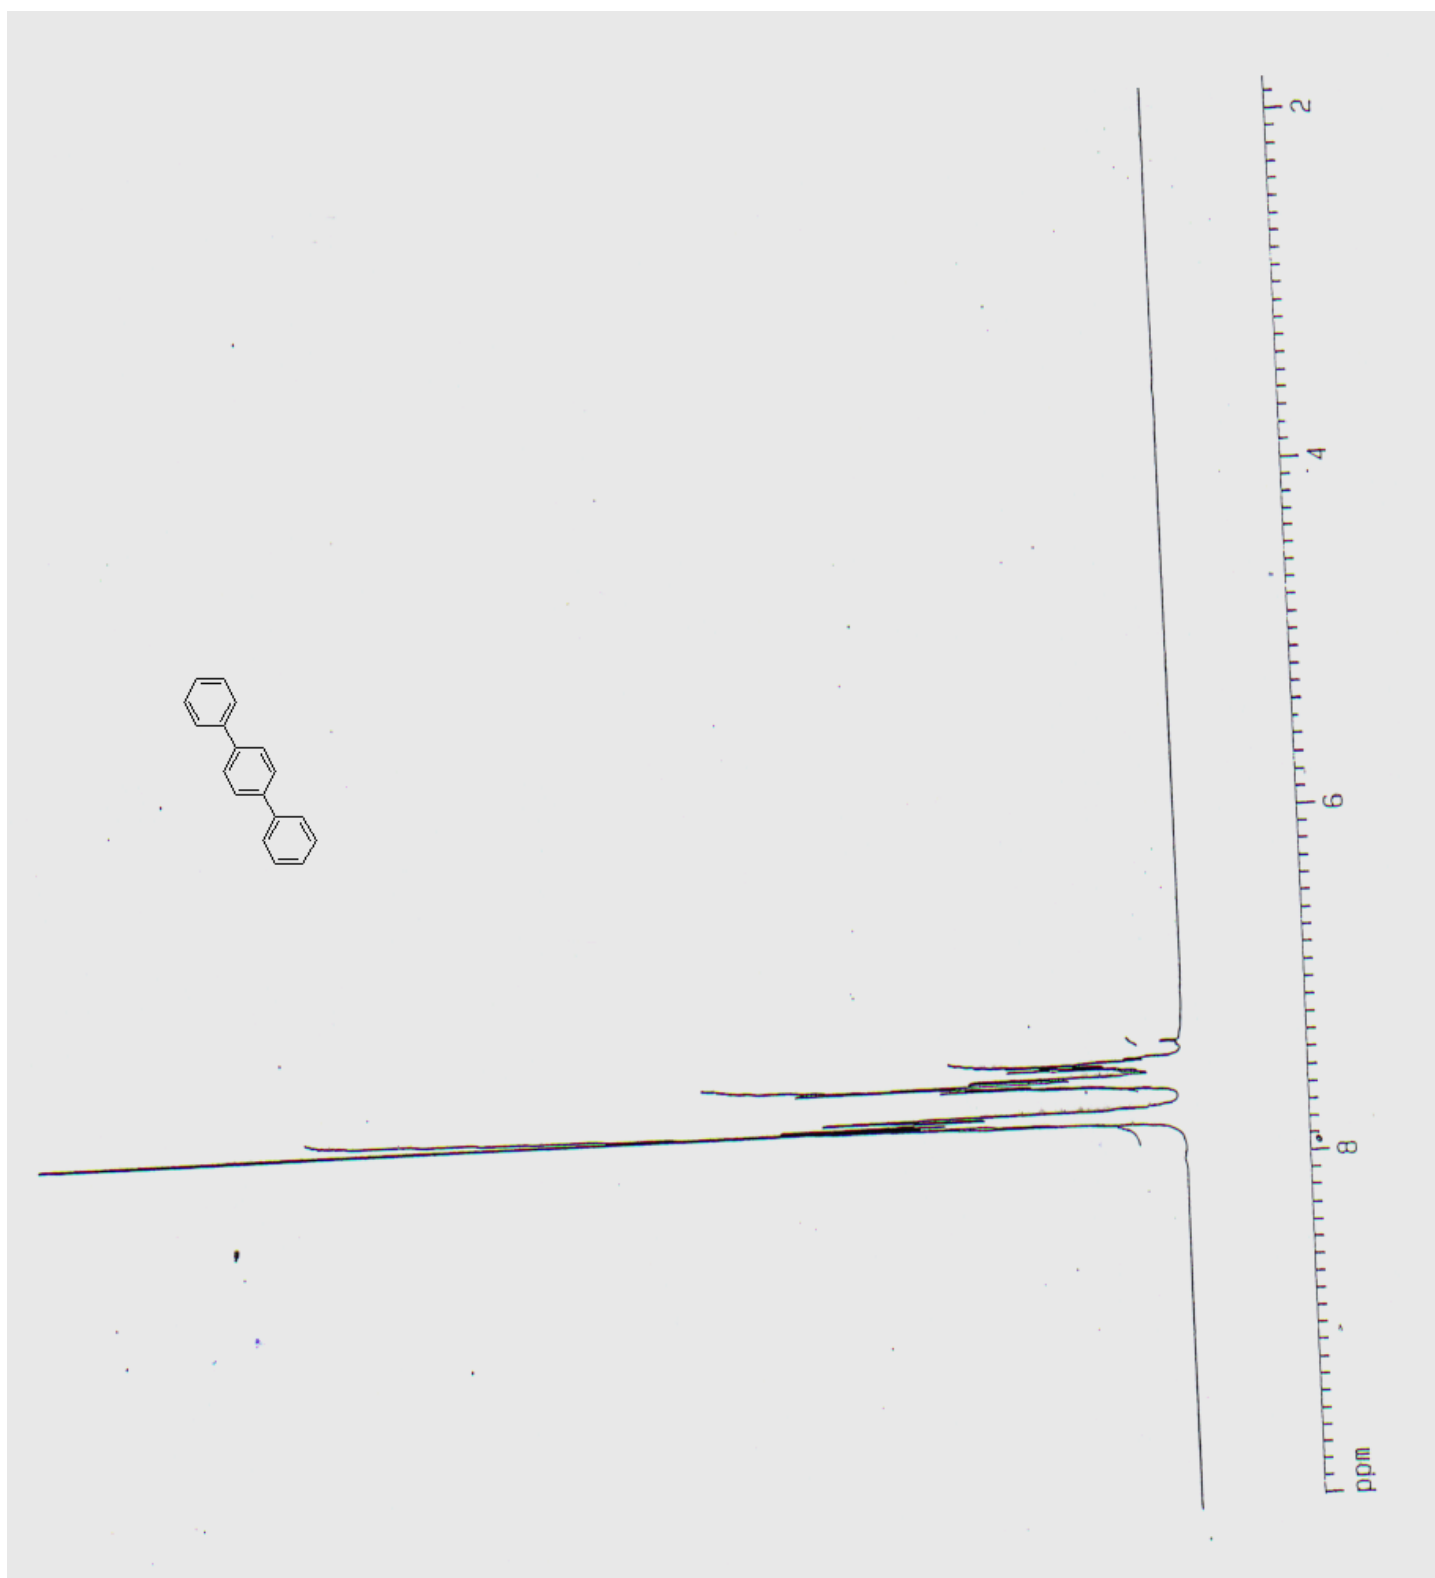

1,4-Diphenylbenzene (**2h**) ( $^{13}\text{C}$  NMR in  $\text{CDCl}_3$ )

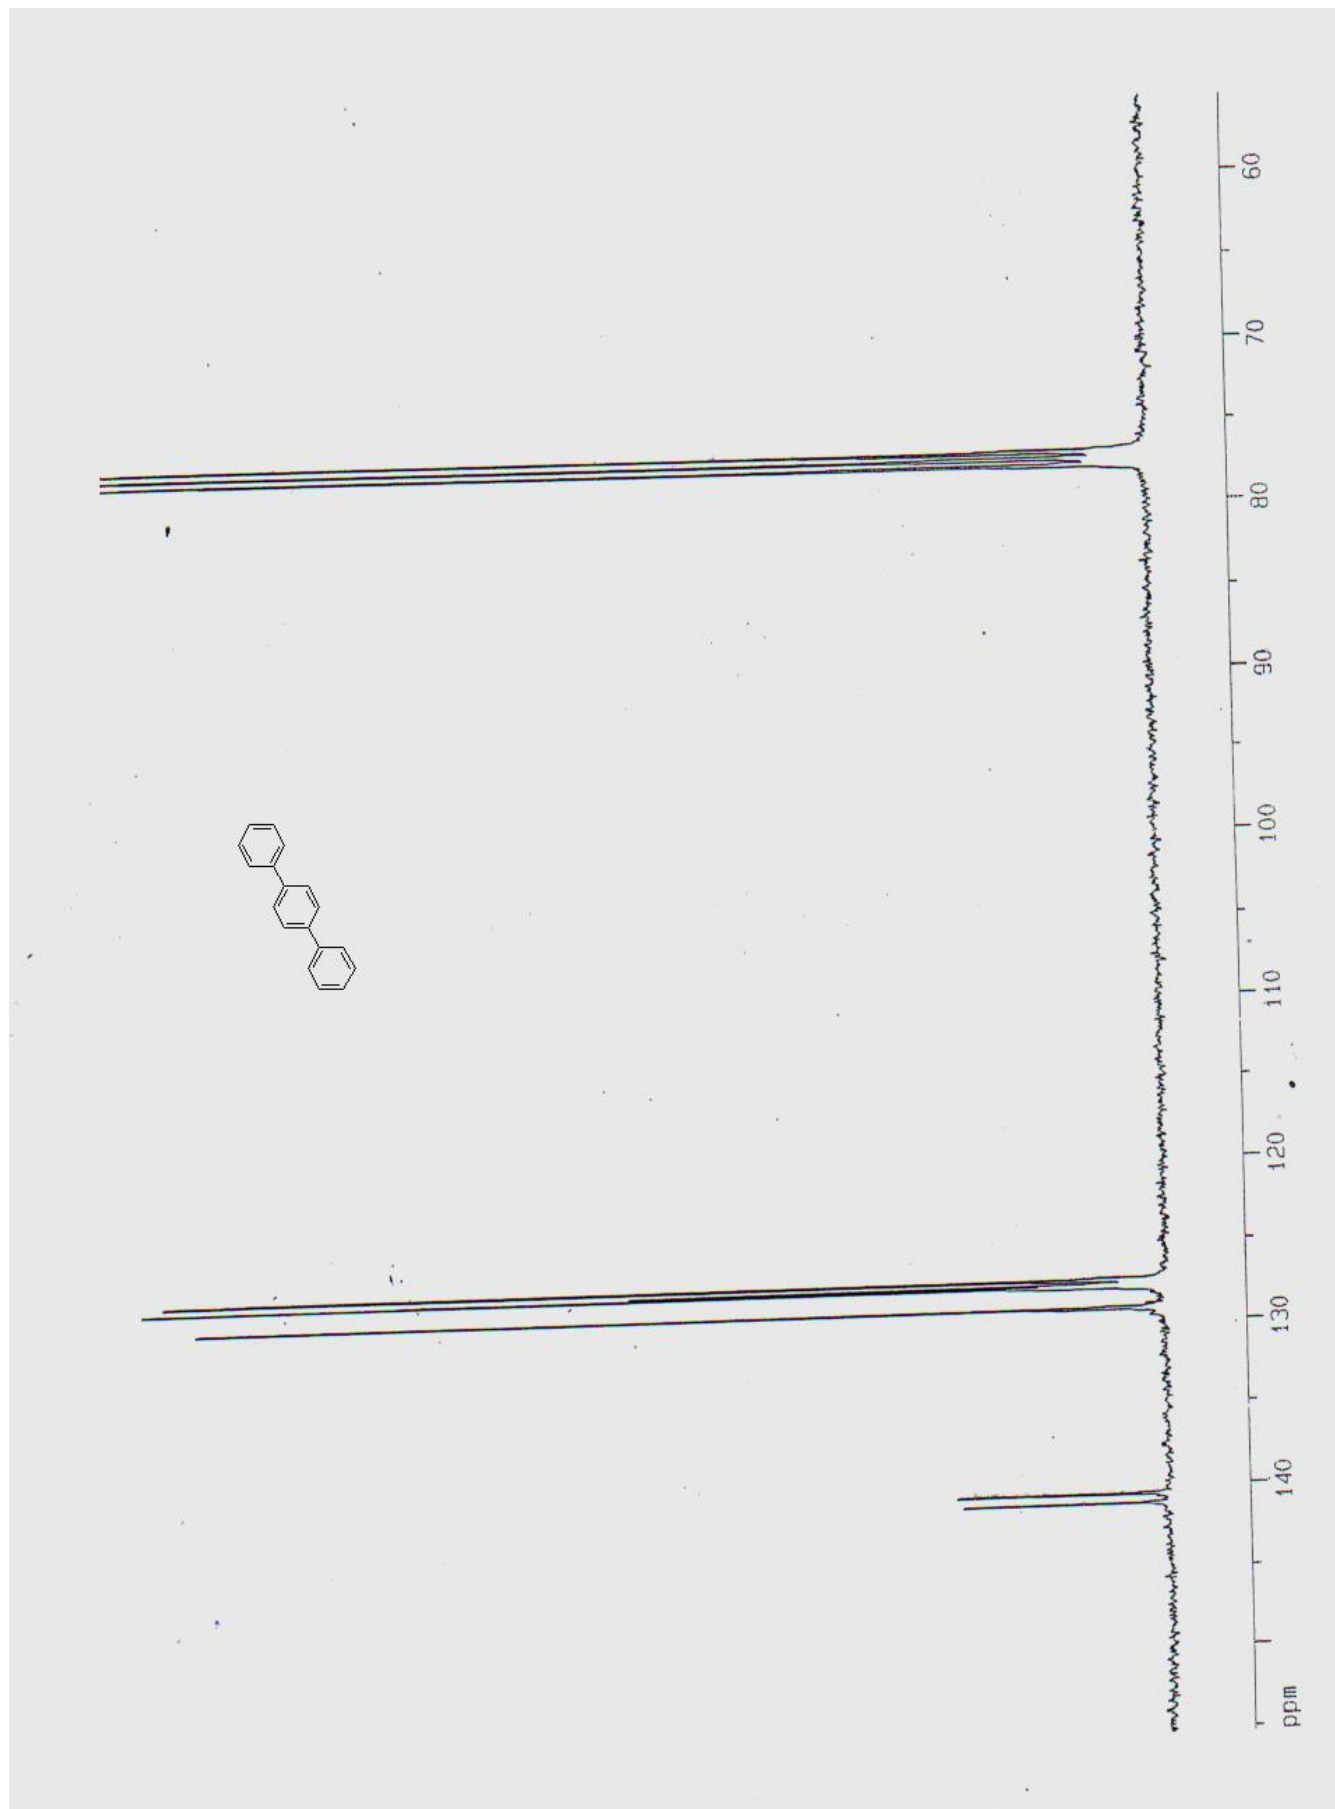

4-Bromobiphenyl (**2i**) ( $^1\text{H}$  NMR in  $\text{CDCl}_3$ )

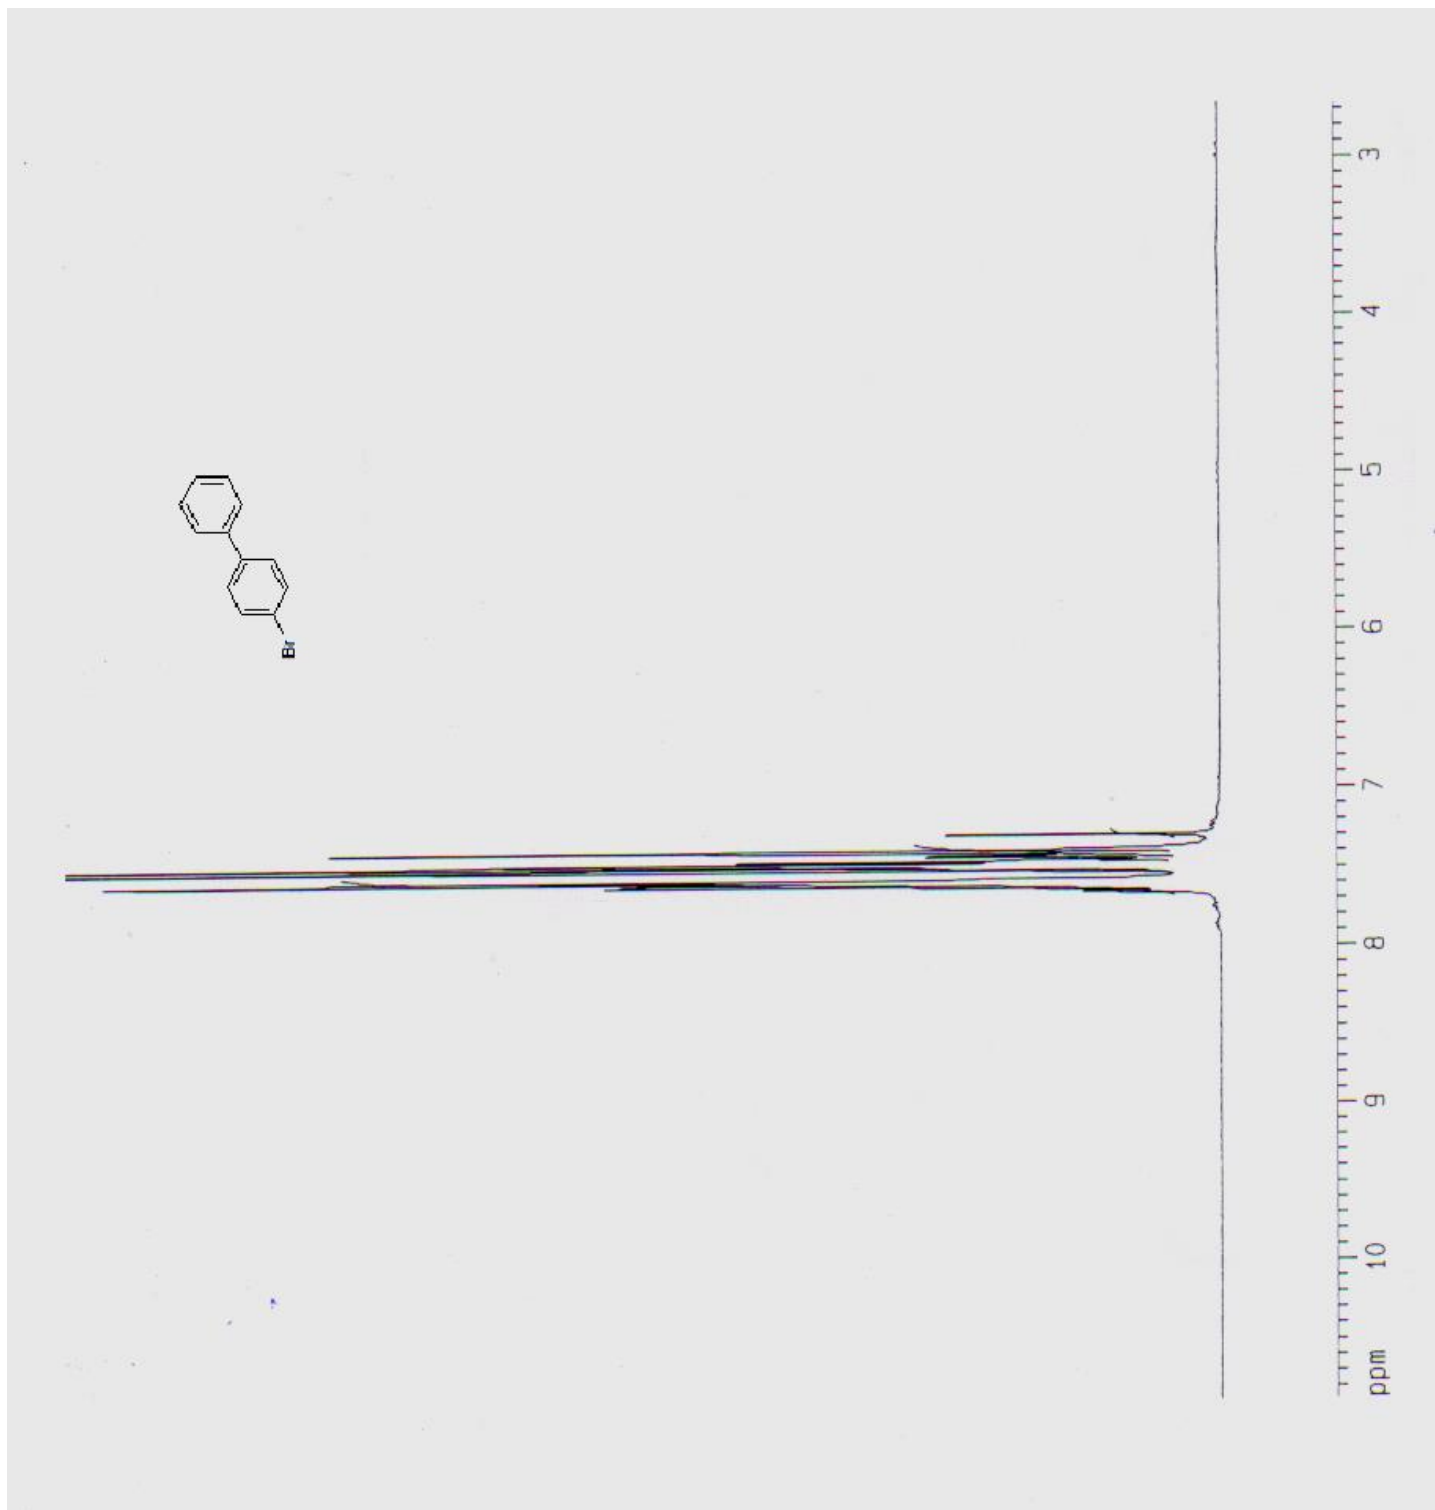

4-Bromobiphenyl (**2i**) ( $^{13}\text{C}$  NMR in  $\text{CDCl}_3$ )

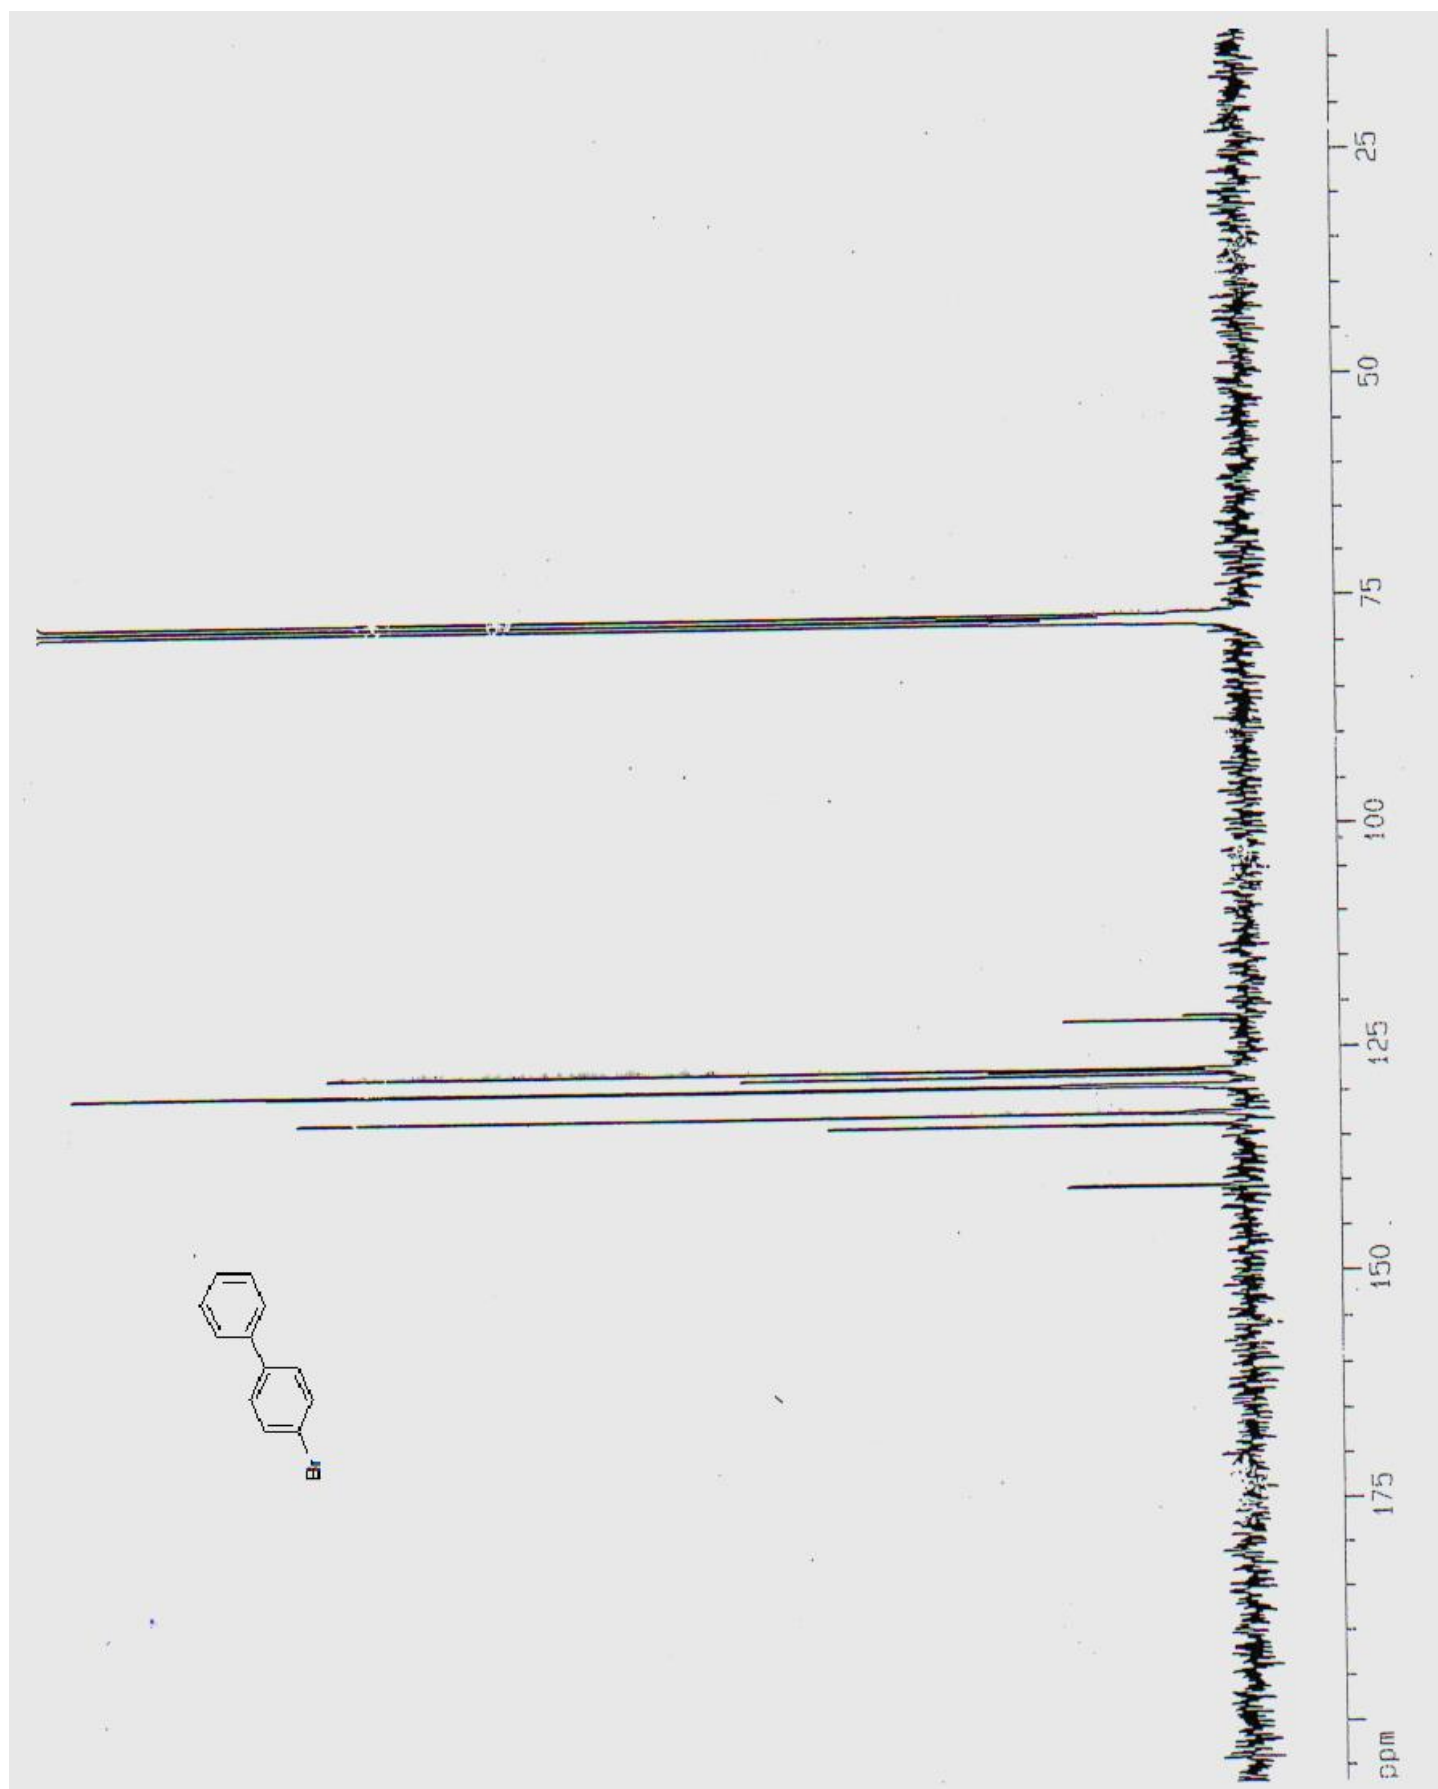

2,4-Dinitrobiphenyl (**2k**) ( $^1\text{H}$  NMR in  $\text{CDCl}_3$ )

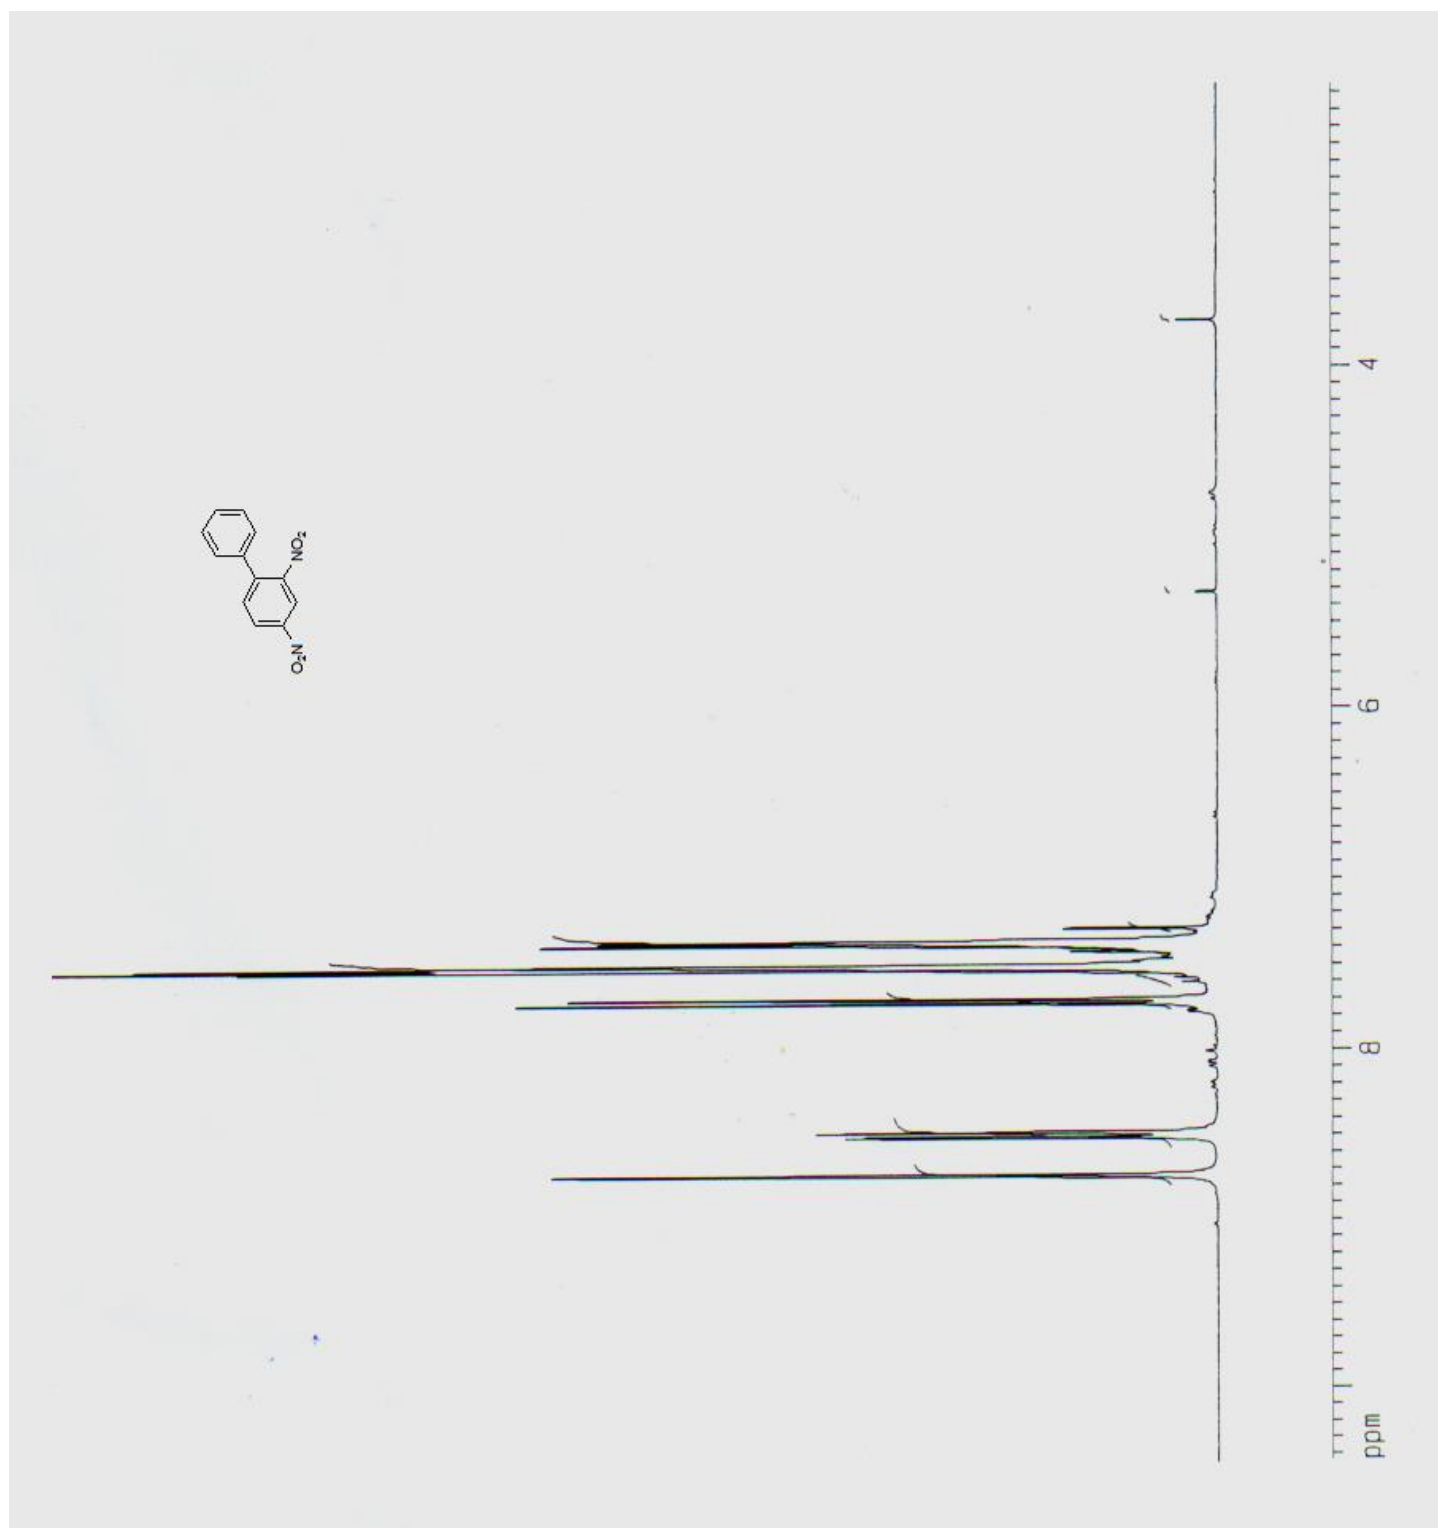



2,4-Dinitrobiphenyl (**2k**) ( $^{13}\text{C}$  NMR in  $\text{CDCl}_3$ )

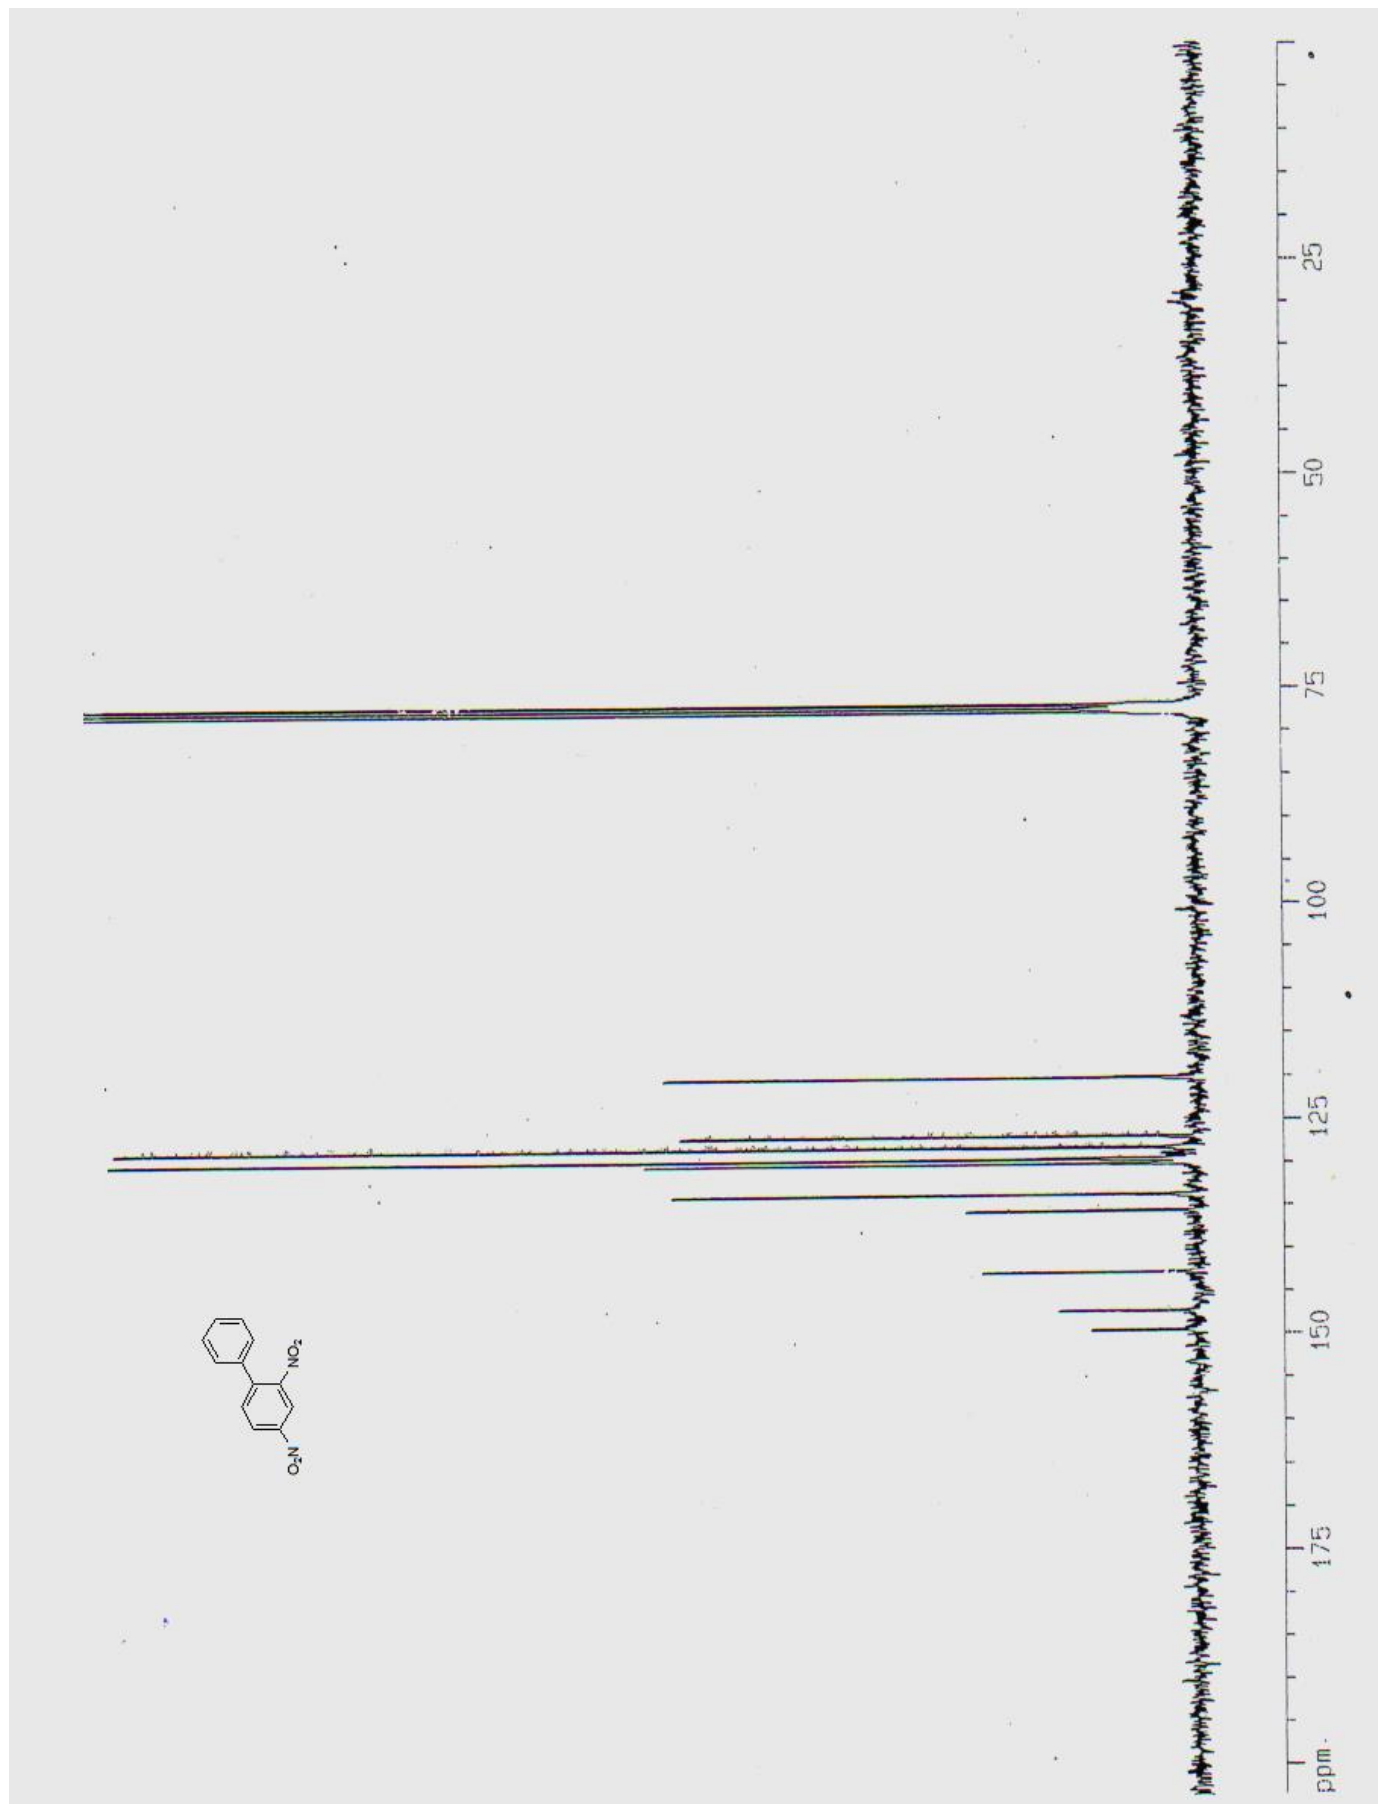

(2) **Powder XRD analysis data of SS-Pd:** The powdered SS-Pd was prepared by grinding SS-Pd. The XRD pattern of both fresh as well as used (after 5<sup>th</sup> cycle) shows a hump at  $2\Theta = 40$  which indicates the presence of Pd(0).<sup>1</sup>

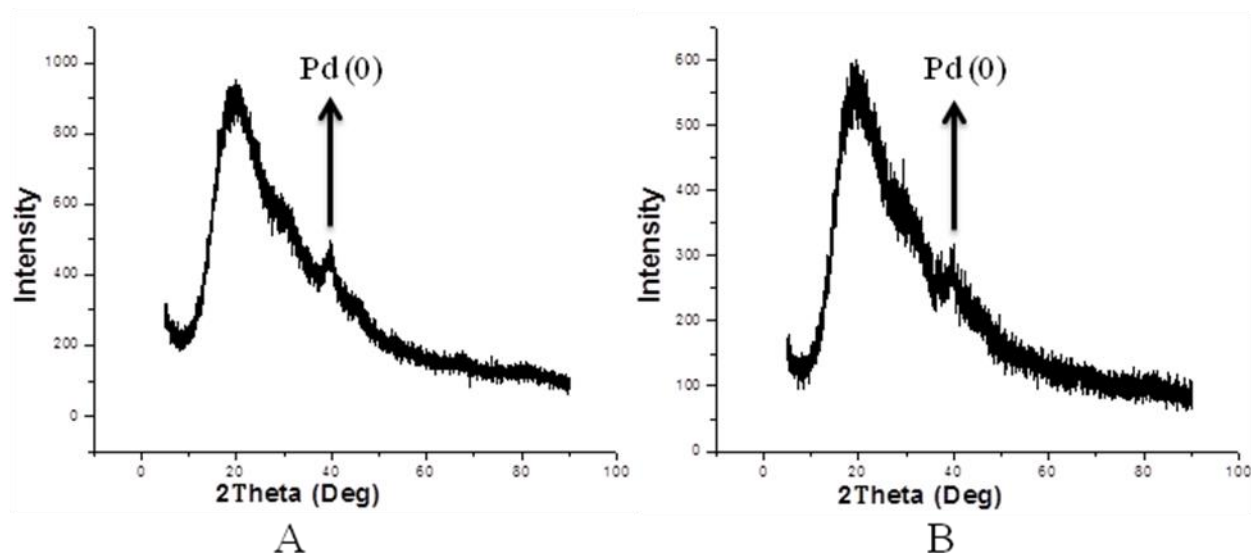

Fig 2. (A) Powder XRD pattern of freshly prepared powdered SS-Pd; (B) Powder XRD pattern of SS-Pd after 5<sup>th</sup> cycle.

### Reference

1. R. Wojcieszak, M. J. Genet, P. Eloy, P. Ruiz and E. M. Gaigneaux, *J. Phys. Chem. C* 2010, **114**, 16677–16684.
